# Supplementary material for: Development of a Cancer‐Associated Fibroblast‐Related Prognostic Model in Breast Cancer via Bulk and Single‐Cell RNA Sequencing
Source: Hindawi journal article supplement (doi:10.1155/2022/2955359), 2022-01-01
Supplement: f2 [file 2955359.f2.pdf]

| Type | ID         | Description     | GeneRa  | BgRatio   | pvalue   | p.adjust | qvalue   | geneID | Count |
|------|------------|-----------------|---------|-----------|----------|----------|----------|--------|-------|
| BP   | GO:0030198 | extracellular   | 135/177 | 301/18723 | 3.76E-28 | 5.02E-25 | 3.75E-25 | COL1A  | 35    |
| BP   | GO:0043062 | extracellular   | 135/177 | 302/18723 | 4.22E-28 | 5.02E-25 | 3.75E-25 | COL1A  | 35    |
| BP   | GO:0045229 | external enca   | 35/177  | 304/18723 | 5.31E-28 | 5.02E-25 | 3.75E-25 | COL1A  | 35    |
| BP   | GO:0030199 | collagen fibri  | 17/177  | 61/18723  | 6.58E-21 | 4.67E-18 | 3.49E-18 | COL1A  | 17    |
| BP   | GO:0052547 | regulation of   | 27/177  | 461/18723 | 3.24E-14 | 1.84E-11 | 1.37E-11 | TIMP1/ | 27    |
| BP   | GO:0010466 | negative regu   | 20/177  | 262/18723 | 6.95E-13 | 3.29E-10 | 2.46E-10 | TIMP1/ | 20    |
| BP   | GO:0042060 | wound healir    | 24/177  | 422/18723 | 1.83E-12 | 7.44E-10 | 5.55E-10 | TIMP1/ | 24    |
| BP   | GO:0032963 | collagen met    | 13/177  | 104/18723 | 1.79E-11 | 6.35E-09 | 4.74E-09 | COL1A  | 13    |
| BP   | GO:0010951 | negative regu   | 18/177  | 252/18723 | 3.17E-11 | 8.98E-09 | 6.71E-09 | TIMP1/ | 18    |
| BP   | GO:0061448 | connective ti   | 18/177  | 252/18723 | 3.17E-11 | 8.98E-09 | 6.71E-09 | TIMP1/ | 18    |
| BP   | GO:0051346 | negative regu   | 21/177  | 379/18723 | 8.01E-11 | 2.07E-08 | 1.54E-08 | TIMP1/ | 21    |
| BP   | GO:0045861 | negative regu   | 20/177  | 351/18723 | 1.42E-10 | 3.36E-08 | 2.51E-08 | TIMP1/ | 20    |
| BP   | GO:0051271 | negative regu   | 20/177  | 367/18723 | 3.12E-10 | 6.81E-08 | 5.09E-08 | TIMP1/ | 20    |
| BP   | GO:0052548 | regulation of   | 21/177  | 432/18723 | 8.74E-10 | 1.77E-07 | 1.32E-07 | TIMP1/ | 21    |
| BP   | GO:2000146 | negative regu   | 19/177  | 359/18723 | 1.45E-09 | 2.74E-07 | 2.05E-07 | TIMP1/ | 19    |
| BP   | GO:0031589 | cell-substrate  | 19/177  | 363/18723 | 1.74E-09 | 3.09E-07 | 2.31E-07 | COL1A  | 19    |
| BP   | GO:0071559 | response to t   | 16/177  | 256/18723 | 2.90E-09 | 4.75E-07 | 3.55E-07 | COL1A  | 16    |
| BP   | GO:0010810 | regulation of   | 15/177  | 221/18723 | 3.02E-09 | 4.75E-07 | 3.55E-07 | COL1A  | 15    |
| BP   | GO:0051216 | cartilage dev   | 14/177  | 190/18723 | 3.59E-09 | 5.37E-07 | 4.01E-07 | TIMP1/ | 14    |
| BP   | GO:0030336 | negative regu   | 18/177  | 344/18723 | 4.80E-09 | 6.81E-07 | 5.09E-07 | TIMP1/ | 18    |
| BP   | GO:0040013 | negative regu   | 19/177  | 391/18723 | 5.89E-09 | 7.96E-07 | 5.94E-07 | TIMP1/ | 19    |
| BP   | GO:0007178 | transmembra     | 18/177  | 355/18723 | 7.85E-09 | 1.01E-06 | 7.56E-07 | COL1A  | 18    |
| BP   | GO:0071560 | cellular respc  | 15/177  | 250/18723 | 1.60E-08 | 1.98E-06 | 1.48E-06 | COL1A  | 15    |
| BP   | GO:0001503 | ossification    | 18/177  | 408/18723 | 6.60E-08 | 7.81E-06 | 5.83E-06 | COL1A  | 18    |
| BP   | GO:0045765 | regulation of   | 16/177  | 342/18723 | 1.67E-07 | 1.90E-05 | 1.42E-05 | DCN/S  | 16    |
| BP   | GO:0035987 | endodermal      | 7/177   | 45/18723  | 2.01E-07 | 2.14E-05 | 1.60E-05 | COL6A  | 7     |
| BP   | GO:0070482 | response to c   | 16/177  | 347/18723 | 2.03E-07 | 2.14E-05 | 1.60E-05 | COL1A  | 16    |
| BP   | GO:1901342 | regulation of   | 16/177  | 348/18723 | 2.11E-07 | 2.14E-05 | 1.60E-05 | DCN/S  | 16    |
| BP   | GO:0010812 | negative regu   | 8/177   | 68/18723  | 2.48E-07 | 2.43E-05 | 1.81E-05 | COL1A  | 8     |
| BP   | GO:0060326 | cell chemota    | 15/177  | 310/18723 | 2.69E-07 | 2.51E-05 | 1.87E-05 | CXCL9/ | 15    |
| BP   | GO:0014911 | positive regu   | 7/177   | 47/18723  | 2.74E-07 | 2.51E-05 | 1.87E-05 | POSTN  | 7     |
| BP   | GO:0050900 | leukocyte mi    | 16/177  | 369/18723 | 4.64E-07 | 4.11E-05 | 3.07E-05 | APOD/  | 16    |
| BP   | GO:0032964 | collagen bios   | 7/177   | 51/18723  | 4.89E-07 | 4.20E-05 | 3.14E-05 | COL1A  | 7     |
| BP   | GO:0007517 | muscle orgar    | 15/177  | 327/18723 | 5.30E-07 | 4.43E-05 | 3.31E-05 | DCN/T. | 15    |
| BP   | GO:1903034 | regulation of   | 11/177  | 167/18723 | 5.56E-07 | 4.51E-05 | 3.37E-05 | SERPIN | 11    |
| BP   | GO:0001706 | endoderm fo     | 7/177   | 54/18723  | 7.30E-07 | 5.75E-05 | 4.30E-05 | COL6A  | 7     |
| BP   | GO:0007568 | aging           | 15/177  | 339/18723 | 8.35E-07 | 6.41E-05 | 4.79E-05 | TIMP1/ | 15    |
| BP   | GO:0048771 | tissue remod    | 11/177  | 175/18723 | 8.85E-07 | 6.44E-05 | 4.81E-05 | TIMP1/ | 11    |
| BP   | GO:0045785 | positive regu   | 17/177  | 437/18723 | 9.07E-07 | 6.44E-05 | 4.81E-05 | FN1/SF | 17    |
| BP   | GO:0050673 | epithelial cell | 17/177  | 437/18723 | 9.07E-07 | 6.44E-05 | 4.81E-05 | IGFBP4 | 17    |
| BP   | GO:0032496 | response to l   | 15/177  | 343/18723 | 9.67E-07 | 6.70E-05 | 5.00E-05 | DCN/S  | 15    |
| BP   | GO:0001666 | response to l   | 14/177  | 307/18723 | 1.38E-06 | 9.32E-05 | 6.96E-05 | SOD3/I | 14    |
| BP   | GO:0003012 | muscle syster   | 17/177  | 452/18723 | 1.44E-06 | 9.50E-05 | 7.10E-05 | MYL9/( | 17    |
| BP   | GO:0002237 | response to r   | 15/177  | 363/18723 | 1.96E-06 | 0.000124 | 9.27E-05 | DCN/S  | 15    |
| BP   | GO:0014910 | regulation of   | 8/177   | 89/18723  | 2.00E-06 | 0.000124 | 9.27E-05 | POSTN  | 8     |
| BP   | GO:0006959 | humoral immr    | 14/177  | 317/18723 | 2.01E-06 | 0.000124 | 9.27E-05 | C1S/SE | 14    |
| BP   | GO:0007160 | cell-matrix ac  | 12/177  | 233/18723 | 2.30E-06 | 0.000139 | 0.000104 | COL3A  | 12    |
| BP   | GO:0051928 | positive regu   | 9/177   | 122/18723 | 2.40E-06 | 0.00014  | 0.000104 | THY1/C | 9     |
| BP   | GO:0036293 | response to c   | 14/177  | 322/18723 | 2.41E-06 | 0.00014  | 0.000104 | SOD3/I | 14    |
| BP   | GO:0043567 | regulation of   | 5/177   | 24/18723  | 2.62E-06 | 0.000149 | 0.000111 | IGFBP4 | 5     |
| BP   | GO:0007179 | transforming    | 11/177  | 198/18723 | 2.97E-06 | 0.000162 | 0.000121 | COL1A  | 11    |
| BP   | GO:0031099 | regeneration    | 11/177  | 198/18723 | 2.97E-06 | 0.000162 | 0.000121 | APOD/  | 11    |
| BP   | GO:0050678 | regulation of   | 15/177  | 381/18723 | 3.54E-06 | 0.000189 | 0.000141 | SPARC, | 15    |
| BP   | GO:0014909 | smooth musc     | 8/177   | 97/18723  | 3.85E-06 | 0.000202 | 0.000151 | POSTN  | 8     |
| BP   | GO:0030178 | negative regu   | 10/177  | 170/18723 | 5.10E-06 | 0.000253 | 0.000189 | IGFBP4 | 10    |
| BP   | GO:0010712 | regulation of   | 6/177   | 47/18723  | 5.11E-06 | 0.000253 | 0.000189 | PDGFR  | 6     |
| BP   | GO:0061041 | regulation of   | 9/177   | 134/18723 | 5.21E-06 | 0.000253 | 0.000189 | SERPIN | 9     |

|    |            |                |        |           |          |          |          |        |    |
|----|------------|----------------|--------|-----------|----------|----------|----------|--------|----|
| BP | GO:0002685 | regulation of  | 11/177 | 210/18723 | 5.22E-06 | 0.000253 | 0.000189 | APOD/  | 11 |
| BP | GO:1903036 | positive regu  | 7/177  | 72/18723  | 5.26E-06 | 0.000253 | 0.000189 | PLPP3/ | 7  |
| BP | GO:0006936 | muscle contr   | 14/177 | 347/18723 | 5.72E-06 | 0.000271 | 0.000202 | MYL9/C | 14 |
| BP | GO:0090092 | regulation of  | 12/177 | 256/18723 | 6.06E-06 | 0.000282 | 0.000211 | SFRP2/ | 12 |
| BP | GO:0090090 | negative regu  | 9/177  | 137/18723 | 6.25E-06 | 0.000286 | 0.000214 | IGFBP4 | 9  |
| BP | GO:0009612 | response to r  | 11/177 | 216/18723 | 6.83E-06 | 0.000308 | 0.00023  | COL1A  | 11 |
| BP | GO:0060537 | muscle tissue  | 15/177 | 403/18723 | 6.96E-06 | 0.000309 | 0.000231 | DCN/IC | 15 |
| BP | GO:0007596 | blood coagul   | 11/177 | 217/18723 | 7.14E-06 | 0.000309 | 0.000231 | MYL9/C | 11 |
| BP | GO:1905049 | negative regu  | 4/177  | 14/18723  | 7.18E-06 | 0.000309 | 0.000231 | TIMP1/ | 4  |
| BP | GO:0001936 | regulation of  | 10/177 | 179/18723 | 8.05E-06 | 0.000339 | 0.000254 | SPARC, | 10 |
| BP | GO:0097529 | myeloid leuk   | 11/177 | 220/18723 | 8.13E-06 | 0.000339 | 0.000254 | CXCL9/ | 11 |
| BP | GO:0007492 | endoderm de    | 7/177  | 77/18723  | 8.25E-06 | 0.00034  | 0.000254 | COL6A  | 7  |
| BP | GO:0048660 | regulation of  | 10/177 | 180/18723 | 8.45E-06 | 0.000343 | 0.000256 | APOD/  | 10 |
| BP | GO:0007599 | hemostasis     | 11/177 | 222/18723 | 8.86E-06 | 0.000349 | 0.000261 | MYL9/C | 11 |
| BP | GO:0050817 | coagulation    | 11/177 | 222/18723 | 8.86E-06 | 0.000349 | 0.000261 | MYL9/C | 11 |
| BP | GO:0014812 | muscle cell r  | 8/177  | 110/18723 | 9.82E-06 | 0.000382 | 0.000285 | POSTN  | 8  |
| BP | GO:0048659 | smooth musc    | 10/177 | 184/18723 | 1.02E-05 | 0.000393 | 0.000294 | APOD/  | 10 |
| BP | GO:0016525 | negative regu  | 9/177  | 149/18723 | 1.23E-05 | 0.000467 | 0.000349 | DCN/S  | 9  |
| BP | GO:2000181 | negative regu  | 9/177  | 151/18723 | 1.37E-05 | 0.000513 | 0.000383 | DCN/S  | 9  |
| BP | GO:1901343 | negative regu  | 9/177  | 152/18723 | 1.45E-05 | 0.000534 | 0.000399 | DCN/S  | 9  |
| BP | GO:0030111 | regulation of  | 13/177 | 328/18723 | 1.51E-05 | 0.000548 | 0.000409 | COL1A  | 13 |
| BP | GO:0001935 | endothelial c  | 10/177 | 193/18723 | 1.55E-05 | 0.000558 | 0.000417 | SPARC, | 10 |
| BP | GO:0002683 | negative regu  | 15/177 | 434/18723 | 1.67E-05 | 0.000594 | 0.000444 | COL3A  | 15 |
| BP | GO:0071674 | mononuclear    | 10/177 | 196/18723 | 1.78E-05 | 0.000622 | 0.000465 | APOD/  | 10 |
| BP | GO:0018149 | peptide cross  | 5/177  | 35/18723  | 1.84E-05 | 0.000637 | 0.000476 | BGN/D  | 5  |
| BP | GO:0001704 | formation of   | 8/177  | 121/18723 | 1.98E-05 | 0.000675 | 0.000505 | COL6A  | 8  |
| BP | GO:0016055 | Wnt signaling  | 15/177 | 444/18723 | 2.18E-05 | 0.000737 | 0.000551 | COL1A  | 15 |
| BP | GO:0198738 | cell-cell sign | 15/177 | 446/18723 | 2.30E-05 | 0.000763 | 0.00057  | COL1A  | 15 |
| BP | GO:1904705 | regulation of  | 7/177  | 90/18723  | 2.31E-05 | 0.000763 | 0.00057  | IGFBP5 | 7  |
| BP | GO:0048009 | insulin-like g | 5/177  | 37/18723  | 2.43E-05 | 0.000794 | 0.000593 | IGFBP4 | 5  |
| BP | GO:1990874 | vascular asso  | 7/177  | 91/18723  | 2.49E-05 | 0.000798 | 0.000596 | IGFBP5 | 7  |
| BP | GO:0071621 | granulocyte c  | 8/177  | 125/18723 | 2.50E-05 | 0.000798 | 0.000596 | CXCL9/ | 8  |
| BP | GO:0050680 | negative regu  | 9/177  | 164/18723 | 2.65E-05 | 0.000837 | 0.000625 | SPARC, | 9  |
| BP | GO:0022617 | extracellular  | 16/177 | 63/18723  | 2.85E-05 | 0.000889 | 0.000664 | CTSK/N | 6  |
| BP | GO:0007162 | negative regu  | 12/177 | 303/18723 | 3.25E-05 | 0.001003 | 0.000749 | COL1A  | 12 |
| BP | GO:0006956 | complement     | 8/177  | 130/18723 | 3.32E-05 | 0.001013 | 0.000756 | C1S/SE | 8  |
| BP | GO:0090287 | regulation of  | 12/177 | 304/18723 | 3.36E-05 | 0.001014 | 0.000757 | DCN/S  | 12 |
| BP | GO:0090101 | negative regu  | 8/177  | 131/18723 | 3.51E-05 | 0.001047 | 0.000782 | SFRP2/ | 8  |
| BP | GO:0030193 | regulation of  | 6/177  | 66/18723  | 3.72E-05 | 0.001101 | 0.000822 | SERPIN | 6  |
| BP | GO:0070372 | regulation of  | 12/177 | 309/18723 | 3.94E-05 | 0.001151 | 0.00086  | FN1/C  | 12 |
| BP | GO:0030449 | regulation of  | 4/177  | 21/18723  | 4.07E-05 | 0.00118  | 0.000881 | SERPIN | 4  |
| BP | GO:1900046 | regulation of  | 6/177  | 68/18723  | 4.42E-05 | 0.001266 | 0.000946 | SERPIN | 6  |
| BP | GO:0060840 | artery develo  | 7/177  | 100/18723 | 4.58E-05 | 0.0013   | 0.000971 | PDGFR  | 7  |
| BP | GO:0000302 | response to r  | 10/177 | 222/18723 | 5.14E-05 | 0.001445 | 0.001079 | COL1A  | 10 |
| BP | GO:0045123 | cellular extra | 6/177  | 70/18723  | 5.21E-05 | 0.001449 | 0.001083 | THY1/C | 6  |
| BP | GO:0050818 | regulation of  | 6/177  | 71/18723  | 5.65E-05 | 0.001541 | 0.001151 | SERPIN | 6  |
| BP | GO:0071230 | cellular respc | 6/177  | 71/18723  | 5.65E-05 | 0.001541 | 0.001151 | COL1A  | 6  |
| BP | GO:0048661 | positive regu  | 7/177  | 104/18723 | 5.89E-05 | 0.001571 | 0.001173 | IGFBP5 | 7  |
| BP | GO:0032355 | response to ε  | 8/177  | 141/18723 | 5.92E-05 | 0.001571 | 0.001173 | COL1A  | 8  |
| BP | GO:0050921 | positive regu  | 8/177  | 141/18723 | 5.92E-05 | 0.001571 | 0.001173 | CCL19/ | 8  |
| BP | GO:0150063 | visual system  | 13/177 | 375/18723 | 6.03E-05 | 0.001584 | 0.001183 | SERPIN | 13 |
| BP | GO:0030595 | leukocyte che  | 10/177 | 230/18723 | 6.92E-05 | 0.001801 | 0.001345 | CXCL9/ | 10 |
| BP | GO:0007229 | integrin-mec   | 7/177  | 107/18723 | 7.06E-05 | 0.001808 | 0.00135  | TIMP1/ | 7  |
| BP | GO:0048880 | sensory syste  | 13/177 | 381/18723 | 7.08E-05 | 0.001808 | 0.00135  | SERPIN | 13 |
| BP | GO:0048844 | artery morph   | 6/177  | 74/18723  | 7.13E-05 | 0.001808 | 0.00135  | PDGFR  | 6  |
| BP | GO:0070371 | ERK1 and ER    | 12/177 | 330/18723 | 7.40E-05 | 0.001859 | 0.001389 | FN1/C  | 12 |
| BP | GO:0001937 | negative regu  | 6/177  | 76/18723  | 8.29E-05 | 0.002046 | 0.001528 | SPARC, | 6  |
| BP | GO:0097530 | granulocyte r  | 8/177  | 148/18723 | 8.33E-05 | 0.002046 | 0.001528 | CXCL9/ | 8  |

|    |            |                 |        |           |          |          |          |        |    |
|----|------------|-----------------|--------|-----------|----------|----------|----------|--------|----|
| BP | GO:1905048 | regulation of   | 4/177  | 25/18723  | 8.36E-05 | 0.002046 | 0.001528 | TIMP1/ | 4  |
| BP | GO:1903053 | regulation of   | 5/177  | 48/18723  | 8.79E-05 | 0.002132 | 0.001593 | AEBP1/ | 5  |
| BP | GO:0090288 | negative regu   | 7/177  | 111/18723 | 8.91E-05 | 0.002142 | 0.0016   | DCN/S  | 7  |
| BP | GO:0048251 | elastic fiber a | 3/177  | 10/18723  | 9.49E-05 | 0.002264 | 0.001691 | MFAP4  | 3  |
| BP | GO:2001236 | regulation of   | 8/177  | 151/18723 | 9.59E-05 | 0.002268 | 0.001694 | SFRP2/ | 8  |
| BP | GO:1904707 | positive regu   | 5/177  | 49/18723  | 9.72E-05 | 0.002279 | 0.001702 | IGFBP5 | 5  |
| BP | GO:0044344 | cellular respc  | 7/177  | 113/18723 | 9.97E-05 | 0.002319 | 0.001732 | COL1A  | 7  |
| BP | GO:0071229 | cellular respc  | 6/177  | 80/18723  | 0.00011  | 0.002548 | 0.001903 | COL1A  | 6  |
| BP | GO:0071675 | regulation of   | 7/177  | 115/18723 | 0.000111 | 0.002548 | 0.001903 | APOD/  | 7  |
| BP | GO:0033002 | muscle cell p   | 10/177 | 248/18723 | 0.000129 | 0.002897 | 0.002164 | APOD/  | 10 |
| BP | GO:0043277 | apoptotic cel   | 5/177  | 52/18723  | 0.000129 | 0.002897 | 0.002164 | MFGE8  | 5  |
| BP | GO:0001867 | complement      | 3/177  | 11/18723  | 0.00013  | 0.002897 | 0.002164 | SERPIN | 3  |
| BP | GO:0009410 | response to >   | 14/177 | 462/18723 | 0.000131 | 0.002913 | 0.002176 | COL1A  | 14 |
| BP | GO:0071774 | response to f   | 7/177  | 120/18723 | 0.000145 | 0.003188 | 0.002382 | COL1A  | 7  |
| BP | GO:0072001 | renal system    | 11/177 | 302/18723 | 0.000146 | 0.003188 | 0.002382 | DCN/A  | 11 |
| BP | GO:0060070 | canonical Wr    | 11/177 | 303/18723 | 0.00015  | 0.003257 | 0.002433 | COL1A  | 11 |
| BP | GO:0060828 | regulation of   | 10/177 | 253/18723 | 0.000152 | 0.003261 | 0.002436 | COL1A  | 10 |
| BP | GO:0010524 | positive regu   | 5/177  | 54/18723  | 0.000155 | 0.00331  | 0.002472 | THY1/C | 5  |
| BP | GO:0002688 | regulation of   | 7/177  | 122/18723 | 0.000161 | 0.003378 | 0.002523 | CCL19/ | 7  |
| BP | GO:0051924 | regulation of   | 10/177 | 255/18723 | 0.000162 | 0.003378 | 0.002523 | THY1/C | 10 |
| BP | GO:0001558 | regulation of   | 13/177 | 414/18723 | 0.000162 | 0.003378 | 0.002523 | IGFBP7 | 13 |
| BP | GO:1905517 | macrophage      | 5/177  | 55/18723  | 0.000169 | 0.003455 | 0.002581 | RARRE  | 5  |
| BP | GO:0010811 | positive regu   | 7/177  | 123/18723 | 0.000169 | 0.003455 | 0.002581 | FN1/TF | 7  |
| BP | GO:0009886 | post-embryo     | 3/177  | 12/18723  | 0.000172 | 0.003455 | 0.002581 | FBN1/E | 3  |
| BP | GO:0038063 | collagen-acti   | 3/177  | 12/18723  | 0.000172 | 0.003455 | 0.002581 | COL1A  | 3  |
| BP | GO:0043568 | positive regu   | 3/177  | 12/18723  | 0.000172 | 0.003455 | 0.002581 | IGFBP4 | 3  |
| BP | GO:0070098 | chemokine-r     | 6/177  | 88/18723  | 0.000187 | 0.00374  | 0.002794 | CXCL9/ | 6  |
| BP | GO:0090130 | tissue migrat   | 12/177 | 365/18723 | 0.00019  | 0.003777 | 0.002822 | DCN/S  | 12 |
| BP | GO:0002063 | chondrocyte     | 4/177  | 31/18723  | 0.000199 | 0.003917 | 0.002926 | SFRP2/ | 4  |
| BP | GO:0009615 | response to \   | 12/177 | 367/18723 | 0.0002   | 0.003917 | 0.002926 | ACTA2  | 12 |
| BP | GO:0016049 | cell growth     | 14/177 | 482/18723 | 0.000204 | 0.003958 | 0.002957 | IGFBP7 | 14 |
| BP | GO:0034109 | homotypic ce    | 6/177  | 90/18723  | 0.000212 | 0.004087 | 0.003053 | MYL9/F | 6  |
| BP | GO:0017015 | regulation of   | 7/177  | 128/18723 | 0.000217 | 0.004152 | 0.003102 | TGFB1I | 7  |
| BP | GO:0035904 | aorta develop   | 5/177  | 58/18723  | 0.000218 | 0.004152 | 0.003102 | PDGFR  | 5  |
| BP | GO:0001654 | eye developr    | 12/177 | 371/18723 | 0.000221 | 0.004164 | 0.003111 | SERPIN | 12 |
| BP | GO:1902043 | positive regu   | 3/177  | 13/18723  | 0.000222 | 0.004164 | 0.003111 | TIMP3/ | 3  |
| BP | GO:0090303 | positive regu   | 5/177  | 59/18723  | 0.000236 | 0.004413 | 0.003297 | PLPP3/ | 5  |
| BP | GO:0097191 | extrinsic apo   | 9/177  | 219/18723 | 0.000244 | 0.00452  | 0.003376 | SFRP2/ | 9  |
| BP | GO:1903844 | regulation of   | 7/177  | 131/18723 | 0.00025  | 0.004606 | 0.00344  | TGFB1I | 7  |
| BP | GO:0031102 | neuron proje    | 5/177  | 60/18723  | 0.000256 | 0.004686 | 0.0035   | APOD/  | 5  |
| BP | GO:0002690 | positive regu   | 6/177  | 94/18723  | 0.000268 | 0.004882 | 0.003647 | CCL19/ | 6  |
| BP | GO:0050920 | regulation of   | 9/177  | 223/18723 | 0.000279 | 0.004998 | 0.003734 | CCL19/ | 9  |
| BP | GO:0010771 | negative regu   | 3/177  | 14/18723  | 0.00028  | 0.004998 | 0.003734 | POSTN  | 3  |
| BP | GO:1900025 | negative regu   | 3/177  | 14/18723  | 0.00028  | 0.004998 | 0.003734 | POSTN  | 3  |
| BP | GO:0007044 | cell-substrate  | 6/177  | 95/18723  | 0.000284 | 0.005041 | 0.003766 | APOD/  | 6  |
| BP | GO:0035909 | aorta morpho    | 4/177  | 34/18723  | 0.000287 | 0.005057 | 0.003778 | PDGFR  | 4  |
| BP | GO:0001101 | response to ε   | 7/177  | 135/18723 | 0.0003   | 0.005205 | 0.003888 | COL1A  | 7  |
| BP | GO:0002687 | positive regu   | 7/177  | 135/18723 | 0.0003   | 0.005205 | 0.003888 | THY1/C | 7  |
| BP | GO:1904035 | regulation of   | 6/177  | 96/18723  | 0.000301 | 0.005205 | 0.003888 | CD248  | 6  |
| BP | GO:1990868 | response to c   | 6/177  | 97/18723  | 0.000318 | 0.005439 | 0.004063 | CXCL9/ | 6  |
| BP | GO:1990869 | cellular respc  | 6/177  | 97/18723  | 0.000318 | 0.005439 | 0.004063 | CXCL9/ | 6  |
| BP | GO:0001569 | branching inv   | 4/177  | 35/18723  | 0.000322 | 0.005464 | 0.004082 | SFRP2/ | 4  |
| BP | GO:0045766 | positive regu   | 8/177  | 181/18723 | 0.000332 | 0.005553 | 0.004148 | SFRP2/ | 8  |
| BP | GO:1904018 | positive regu   | 8/177  | 181/18723 | 0.000332 | 0.005553 | 0.004148 | SFRP2/ | 8  |
| BP | GO:0043542 | endothelial c   | 10/177 | 279/18723 | 0.000333 | 0.005553 | 0.004148 | DCN/S  | 10 |
| BP | GO:0048569 | post-embryo     | 3/177  | 15/18723  | 0.000348 | 0.005736 | 0.004285 | FBN1/E | 3  |
| BP | GO:0090594 | inflammatory    | 3/177  | 15/18723  | 0.000348 | 0.005736 | 0.004285 | TIMP1/ | 3  |
| BP | GO:0001655 | urogenital sy   | 11/177 | 338/18723 | 0.000384 | 0.006271 | 0.004684 | DCN/A  | 11 |

|    |            |                 |        |          |          |          |          |        |    |
|----|------------|-----------------|--------|----------|----------|----------|----------|--------|----|
| BP | GO:0007369 | gastrulation    | 8/177  | 185/1872 | 0.000384 | 0.006271 | 0.004684 | COL6A  | 8  |
| BP | GO:0150115 | cell-substrate  | 6/177  | 101/1872 | 0.000396 | 0.006415 | 0.004792 | APOD/  | 6  |
| BP | GO:0008217 | regulation of   | 8/177  | 186/1872 | 0.000399 | 0.006415 | 0.004792 | COL1A  | 8  |
| BP | GO:0072678 | T cell migrati  | 5/177  | 66/1872  | 0.0004   | 0.006415 | 0.004792 | APOD/  | 5  |
| BP | GO:0072109 | glomerular n    | 3/177  | 16/1872  | 0.000425 | 0.006774 | 0.00506  | ACTA2  | 3  |
| BP | GO:0030593 | neutrophil ch   | 6/177  | 103/1872 | 0.000439 | 0.006967 | 0.005204 | CXCL9/ | 6  |
| BP | GO:0048246 | macrophage      | 4/177  | 38/1872  | 0.000443 | 0.006991 | 0.005222 | RARRE  | 4  |
| BP | GO:0042698 | ovulation cyc   | 5/177  | 68/1872  | 0.00046  | 0.007206 | 0.005383 | SERPIN | 5  |
| BP | GO:0001822 | kidney devel    | 10/177 | 293/1872 | 0.000489 | 0.007619 | 0.005691 | DCN/A  | 10 |
| BP | GO:0007565 | female pregr    | 8/177  | 193/1872 | 0.000509 | 0.007802 | 0.005828 | TIMP1/ | 8  |
| BP | GO:0002062 | chondrocyte     | 6/177  | 106/1872 | 0.000512 | 0.007802 | 0.005828 | SFRP2/ | 6  |
| BP | GO:0038065 | collagen-acti   | 3/177  | 17/1872  | 0.000512 | 0.007802 | 0.005828 | COL1A  | 3  |
| BP | GO:0061298 | retina vascul   | 3/177  | 17/1872  | 0.000512 | 0.007802 | 0.005828 | PDGFR  | 3  |
| BP | GO:0001819 | positive regu   | 13/177 | 467/1872 | 0.000514 | 0.007802 | 0.005828 | LUM/P  | 13 |
| BP | GO:1901654 | response to l   | 8/177  | 194/1872 | 0.000527 | 0.007958 | 0.005944 | IGFBP7 | 8  |
| BP | GO:0051281 | positive regu   | 4/177  | 40/1872  | 0.000541 | 0.008123 | 0.006068 | THY1/C | 4  |
| BP | GO:0010952 | positive regu   | 8/177  | 197/1872 | 0.000583 | 0.008712 | 0.006508 | FN1/SF | 8  |
| BP | GO:0001953 | negative regu   | 4/177  | 41/1872  | 0.000595 | 0.008795 | 0.00657  | APOD/  | 4  |
| BP | GO:1905521 | regulation of   | 4/177  | 41/1872  | 0.000595 | 0.008795 | 0.00657  | RARRE  | 4  |
| BP | GO:0001667 | ameboidal-ty    | 13/177 | 475/1872 | 0.000602 | 0.008796 | 0.00657  | TIMP1/ | 13 |
| BP | GO:0010631 | epithelial cell | 11/177 | 357/1872 | 0.000606 | 0.008796 | 0.00657  | DCN/S  | 11 |
| BP | GO:0006957 | complement      | 3/177  | 18/1872  | 0.000611 | 0.008796 | 0.00657  | C3/CFE | 3  |
| BP | GO:0051895 | negative regu   | 3/177  | 18/1872  | 0.000611 | 0.008796 | 0.00657  | APOD/  | 3  |
| BP | GO:0150118 | negative regu   | 3/177  | 18/1872  | 0.000611 | 0.008796 | 0.00657  | APOD/  | 3  |
| BP | GO:0006939 | smooth musc     | 6/177  | 110/1872 | 0.000623 | 0.008936 | 0.006675 | ACTA2  | 6  |
| BP | GO:0035924 | cellular resp   | 5/177  | 73/1872  | 0.000638 | 0.009082 | 0.006784 | DCN/P  | 5  |
| BP | GO:0090132 | epithelium m    | 11/177 | 360/1872 | 0.000649 | 0.009082 | 0.006784 | DCN/S  | 11 |
| BP | GO:0030574 | collagen cata   | 4/177  | 42/1872  | 0.000653 | 0.009082 | 0.006784 | CTSK/M | 4  |
| BP | GO:0032965 | regulation of   | 4/177  | 42/1872  | 0.000653 | 0.009082 | 0.006784 | PDGFR  | 4  |
| BP | GO:0045773 | positive regu   | 4/177  | 42/1872  | 0.000653 | 0.009082 | 0.006784 | FN1/C  | 4  |
| BP | GO:1904037 | positive regu   | 4/177  | 42/1872  | 0.000653 | 0.009082 | 0.006784 | CD248  | 4  |
| BP | GO:0034329 | cell junction   | 12/177 | 420/1872 | 0.000672 | 0.009299 | 0.006946 | APOD/  | 12 |
| BP | GO:0007519 | skeletal musc   | 7/177  | 155/1872 | 0.000689 | 0.009493 | 0.007091 | DCN/E  | 7  |
| BP | GO:0006816 | calcium ion t   | 12/177 | 422/1872 | 0.0007   | 0.009599 | 0.007171 | THY1/C | 12 |
| BP | GO:0010759 | positive regu   | 3/177  | 19/1872  | 0.00072  | 0.009824 | 0.007339 | RARRE  | 3  |
| BP | GO:0048608 | reproductive    | 12/177 | 424/1872 | 0.00073  | 0.009908 | 0.007401 | DCN/S  | 12 |
| BP | GO:0090596 | sensory orga    | 9/177  | 256/1872 | 0.000756 | 0.010219 | 0.007634 | THY1/F | 9  |
| BP | GO:0061458 | reproductive    | 12/177 | 427/1872 | 0.000776 | 0.010435 | 0.007795 | DCN/S  | 12 |
| BP | GO:0043200 | response to z   | 6/177  | 116/1872 | 0.000824 | 0.011036 | 0.008244 | COL1A  | 6  |
| BP | GO:0002920 | regulation of   | 4/177  | 45/1872  | 0.00085  | 0.011274 | 0.008422 | SERPIN | 4  |
| BP | GO:0085029 | extracellular   | 4/177  | 45/1872  | 0.00085  | 0.011274 | 0.008422 | COL1A  | 4  |
| BP | GO:0072676 | lymphocyte r    | 6/177  | 117/1872 | 0.000862 | 0.011336 | 0.008468 | APOD/  | 6  |
| BP | GO:0070373 | negative regu   | 5/177  | 78/1872  | 0.000863 | 0.011336 | 0.008468 | TIMP3/ | 5  |
| BP | GO:0014068 | positive regu   | 5/177  | 79/1872  | 0.000914 | 0.011955 | 0.008931 | DCN/F  | 5  |
| BP | GO:1901214 | regulation of   | 10/177 | 319/1872 | 0.000939 | 0.012225 | 0.009132 | SERPIN | 10 |
| BP | GO:0051607 | defense resp    | 9/177  | 265/1872 | 0.000965 | 0.012447 | 0.009298 | CXCL9/ | 9  |
| BP | GO:0140546 | defense resp    | 9/177  | 265/1872 | 0.000965 | 0.012447 | 0.009298 | CXCL9/ | 9  |
| BP | GO:0035455 | response to i   | 3/177  | 21/1872  | 0.000975 | 0.012459 | 0.009307 | IFITM3 | 3  |
| BP | GO:0044342 | type B pancr    | 3/177  | 21/1872  | 0.000975 | 0.012459 | 0.009307 | IGFBP4 | 3  |
| BP | GO:0050878 | regulation of   | 11/177 | 379/1872 | 0.000988 | 0.012576 | 0.009394 | MYL9/C | 11 |
| BP | GO:0043618 | regulation of   | 4/177  | 47/1872  | 0.001003 | 0.012706 | 0.009491 | EGR1/J | 4  |
| BP | GO:0030512 | negative regu   | 5/177  | 81/1872  | 0.001024 | 0.012886 | 0.009626 | TGFB1I | 5  |
| BP | GO:1904019 | epithelial cell | 6/177  | 121/1872 | 0.001027 | 0.012886 | 0.009626 | CD248  | 6  |
| BP | GO:0060538 | skeletal musc   | 7/177  | 166/1872 | 0.001031 | 0.012886 | 0.009626 | DCN/E  | 7  |
| BP | GO:0050870 | positive regu   | 8/177  | 216/1872 | 0.001061 | 0.013172 | 0.009839 | THY1/C | 8  |
| BP | GO:0031960 | response to c   | 7/177  | 167/1872 | 0.001067 | 0.013172 | 0.009839 | COL1A  | 7  |
| BP | GO:1990266 | neutrophil m    | 6/177  | 122/1872 | 0.001072 | 0.013172 | 0.009839 | CXCL9/ | 6  |
| BP | GO:1902903 | regulation of   | 11/177 | 383/1872 | 0.001075 | 0.013172 | 0.009839 | AEBP1/ | 11 |

|    |            |                 |        |           |          |          |          |         |    |
|----|------------|-----------------|--------|-----------|----------|----------|----------|---------|----|
| BP | GO:0060395 | SMAD protei     | 5/177  | 82/18723  | 0.001082 | 0.013172 | 0.009839 | FOS/VI  | 5  |
| BP | GO:0002686 | negative regu   | 4/177  | 48/18723  | 0.001086 | 0.013172 | 0.009839 | APOD/   | 4  |
| BP | GO:2001238 | positive regu   | 4/177  | 48/18723  | 0.001086 | 0.013172 | 0.009839 | TIMP3/  | 4  |
| BP | GO:0014706 | striated musc   | 11/177 | 384/18723 | 0.001098 | 0.013252 | 0.009899 | DCN/P   | 11 |
| BP | GO:0010975 | regulation of   | 12/177 | 445/18723 | 0.001107 | 0.013252 | 0.009899 | SERPIN  | 12 |
| BP | GO:0030168 | platelet activ  | 6/177  | 123/18723 | 0.001118 | 0.013252 | 0.009899 | MYL9/C  | 6  |
| BP | GO:0055093 | response to f   | 3/177  | 22/18723  | 0.001121 | 0.013252 | 0.009899 | COL1A   | 3  |
| BP | GO:0060343 | trabecula for   | 3/177  | 22/18723  | 0.001121 | 0.013252 | 0.009899 | COL1A   | 3  |
| BP | GO:0090280 | positive regu   | 3/177  | 22/18723  | 0.001121 | 0.013252 | 0.009899 | PDGFR   | 3  |
| BP | GO:0030195 | negative regu   | 4/177  | 49/18723  | 0.001174 | 0.013598 | 0.010158 | SERPIN  | 4  |
| BP | GO:0038084 | vascular end    | 4/177  | 49/18723  | 0.001174 | 0.013598 | 0.010158 | DCN/P   | 4  |
| BP | GO:0052372 | modulation t    | 4/177  | 49/18723  | 0.001174 | 0.013598 | 0.010158 | IFITM3, | 4  |
| BP | GO:1902041 | regulation of   | 4/177  | 49/18723  | 0.001174 | 0.013598 | 0.010158 | SFRP2/  | 4  |
| BP | GO:1904752 | regulation of   | 4/177  | 49/18723  | 0.001174 | 0.013598 | 0.010158 | IGFBP5  | 4  |
| BP | GO:0044706 | multi-multic    | 8/177  | 220/18723 | 0.001193 | 0.013767 | 0.010284 | TIMP1/  | 8  |
| BP | GO:0045445 | myoblast diff   | 5/177  | 84/18723  | 0.001206 | 0.013853 | 0.010348 | CXCL9,  | 5  |
| BP | GO:0043270 | positive regu   | 9/177  | 275/18723 | 0.001249 | 0.014298 | 0.01068  | THY1/C  | 9  |
| BP | GO:1900047 | negative regu   | 4/177  | 50/18723  | 0.001267 | 0.014379 | 0.010741 | SERPIN  | 4  |
| BP | GO:1904738 | vascular asso   | 4/177  | 50/18723  | 0.001267 | 0.014379 | 0.010741 | IGFBP5  | 4  |
| BP | GO:0009314 | response to r   | 12/177 | 456/18723 | 0.001362 | 0.015306 | 0.011433 | TIMP1/  | 12 |
| BP | GO:0010656 | negative regu   | 4/177  | 51/18723  | 0.001364 | 0.015306 | 0.011433 | SFRP2/  | 4  |
| BP | GO:0071622 | regulation of   | 4/177  | 51/18723  | 0.001364 | 0.015306 | 0.011433 | CCL19/  | 4  |
| BP | GO:0001952 | regulation of   | 6/177  | 128/18723 | 0.001373 | 0.015344 | 0.011462 | APOD/   | 6  |
| BP | GO:0048041 | focal adhesio   | 5/177  | 87/18723  | 0.001411 | 0.015699 | 0.011727 | APOD/   | 5  |
| BP | GO:0032970 | regulation of   | 11/177 | 397/18723 | 0.001433 | 0.015883 | 0.011865 | PDGFR   | 11 |
| BP | GO:0051043 | regulation of   | 3/177  | 24/18723  | 0.001453 | 0.015979 | 0.011936 | TIMP1/  | 3  |
| BP | GO:2000353 | positive regu   | 3/177  | 24/18723  | 0.001453 | 0.015979 | 0.011936 | CD248,  | 3  |
| BP | GO:0048545 | response to ε   | 10/177 | 339/18723 | 0.001481 | 0.016228 | 0.012122 | COL1A   | 10 |
| BP | GO:0001649 | osteoblast di   | 8/177  | 229/18723 | 0.001539 | 0.0168   | 0.01255  | COL1A   | 8  |
| BP | GO:0022409 | positive regu   | 9/177  | 284/18723 | 0.00156  | 0.016938 | 0.012652 | THY1/C  | 9  |
| BP | GO:0007566 | embryo impl     | 4/177  | 53/18723  | 0.001576 | 0.016938 | 0.012652 | TIMP1/  | 4  |
| BP | GO:0043620 | regulation of   | 4/177  | 53/18723  | 0.001576 | 0.016938 | 0.012652 | EGR1/J  | 4  |
| BP | GO:0050819 | negative regu   | 4/177  | 53/18723  | 0.001576 | 0.016938 | 0.012652 | SERPIN  | 4  |
| BP | GO:0003094 | glomerular fil  | 3/177  | 25/18723  | 0.001639 | 0.017282 | 0.01291  | SULF1/  | 3  |
| BP | GO:0072012 | glomerulus v    | 3/177  | 25/18723  | 0.001639 | 0.017282 | 0.01291  | ACTA2,  | 3  |
| BP | GO:1903901 | negative regu   | 3/177  | 25/18723  | 0.001639 | 0.017282 | 0.01291  | IFITM3, | 3  |
| BP | GO:1904754 | positive regu   | 3/177  | 25/18723  | 0.001639 | 0.017282 | 0.01291  | IGFBP5  | 3  |
| BP | GO:0010721 | negative regu   | 7/177  | 180/18723 | 0.001644 | 0.017282 | 0.01291  | THY1/F  | 7  |
| BP | GO:0043409 | negative regu   | 7/177  | 180/18723 | 0.001644 | 0.017282 | 0.01291  | SFRP2/  | 7  |
| BP | GO:0097205 | renal filtratio | 3/177  | 26/18723  | 0.00184  | 0.019152 | 0.014307 | SULF1/  | 3  |
| BP | GO:1905523 | positive regu   | 3/177  | 26/18723  | 0.00184  | 0.019152 | 0.014307 | RARRE!  | 3  |
| BP | GO:0060485 | mesenchyme      | 9/177  | 291/18723 | 0.001842 | 0.019152 | 0.014307 | COL1A   | 9  |
| BP | GO:0055001 | muscle cell d   | 7/177  | 184/18723 | 0.001863 | 0.019299 | 0.014416 | PDGFR   | 7  |
| BP | GO:0051591 | response to ρ   | 5/177  | 93/18723  | 0.001896 | 0.019567 | 0.014617 | COL1A   | 5  |
| BP | GO:1904645 | response to ε   | 4/177  | 56/18723  | 0.001933 | 0.01988  | 0.01485  | MMP2/   | 4  |
| BP | GO:0071478 | cellular respc  | 7/177  | 186/18723 | 0.001981 | 0.020264 | 0.015137 | TIMP1/  | 7  |
| BP | GO:1903035 | negative regu   | 5/177  | 94/18723  | 0.001987 | 0.020264 | 0.015137 | SERPIN  | 5  |
| BP | GO:0043434 | response to ρ   | 11/177 | 414/18723 | 0.001992 | 0.020264 | 0.015137 | TIMP1/  | 11 |
| BP | GO:1903039 | positive regu   | 8/177  | 239/18723 | 0.002012 | 0.020392 | 0.015233 | THY1/C  | 8  |
| BP | GO:0010758 | regulation of   | 3/177  | 27/18723  | 0.002056 | 0.020546 | 0.015348 | RARRE!  | 3  |
| BP | GO:0032967 | positive regu   | 3/177  | 27/18723  | 0.002056 | 0.020546 | 0.015348 | PDGFR   | 3  |
| BP | GO:0061437 | renal system    | 3/177  | 27/18723  | 0.002056 | 0.020546 | 0.015348 | ACTA2,  | 3  |
| BP | GO:0061440 | kidney vascul   | 3/177  | 27/18723  | 0.002056 | 0.020546 | 0.015348 | ACTA2,  | 3  |
| BP | GO:1900024 | regulation of   | 4/177  | 57/18723  | 0.002064 | 0.020554 | 0.015354 | POSTN   | 4  |
| BP | GO:0045598 | regulation of   | 6/177  | 139/18723 | 0.002088 | 0.020724 | 0.015481 | SFRP2/  | 6  |
| BP | GO:2001233 | regulation of   | 10/177 | 356/18723 | 0.002121 | 0.02097  | 0.015665 | SFRP2/  | 10 |
| BP | GO:0003073 | regulation of   | 5/177  | 96/18723  | 0.00218  | 0.021408 | 0.015992 | POSTN   | 5  |
| BP | GO:0030510 | regulation of   | 5/177  | 96/18723  | 0.00218  | 0.021408 | 0.015992 | SFRP2/  | 5  |

|    |            |                 |        |           |          |          |          |         |    |
|----|------------|-----------------|--------|-----------|----------|----------|----------|---------|----|
| BP | GO:0032956 | regulation of   | 10/177 | 358/18723 | 0.002209 | 0.021615 | 0.016146 | PDGFR   | 10 |
| BP | GO:0034341 | response to i   | 6/177  | 141/18723 | 0.002244 | 0.021736 | 0.016237 | IFITM3, | 6  |
| BP | GO:0035296 | regulation of   | 6/177  | 141/18723 | 0.002244 | 0.021736 | 0.016237 | SOD3/   | 6  |
| BP | GO:0097746 | blood vessel    | 6/177  | 141/18723 | 0.002244 | 0.021736 | 0.016237 | SOD3/   | 6  |
| BP | GO:1901216 | positive regu   | 5/177  | 97/18723  | 0.002281 | 0.02178  | 0.016269 | EGR1/F  | 5  |
| BP | GO:2001237 | negative regu   | 5/177  | 97/18723  | 0.002281 | 0.02178  | 0.016269 | SFRP2/  | 5  |
| BP | GO:0010575 | positive regu   | 3/177  | 28/18723  | 0.002287 | 0.02178  | 0.016269 | C3/CYF  | 3  |
| BP | GO:0010714 | positive regu   | 3/177  | 28/18723  | 0.002287 | 0.02178  | 0.016269 | PDGFR   | 3  |
| BP | GO:0060325 | face morpho     | 3/177  | 28/18723  | 0.002287 | 0.02178  | 0.016269 | COL1A   | 3  |
| BP | GO:0035150 | regulation of   | 6/177  | 142/18723 | 0.002325 | 0.022068 | 0.016485 | SOD3/   | 6  |
| BP | GO:0001836 | release of cyt  | 4/177  | 59/18723  | 0.002344 | 0.022121 | 0.016525 | JUN/LM  | 4  |
| BP | GO:0070997 | neuron death    | 10/177 | 361/18723 | 0.002346 | 0.022121 | 0.016525 | SERPIN  | 10 |
| BP | GO:0032103 | positive regu   | 11/177 | 427/18723 | 0.00253  | 0.02378  | 0.017764 | CCL19/  | 11 |
| BP | GO:2000401 | regulation of   | 4/177  | 61/18723  | 0.002648 | 0.024806 | 0.01853  | APOD/   | 4  |
| BP | GO:0022604 | regulation of   | 9/177  | 309/18723 | 0.002759 | 0.025755 | 0.019239 | SPARC,  | 9  |
| BP | GO:0036296 | response to i   | 3/177  | 30/18723  | 0.002795 | 0.02601  | 0.01943  | COL1A   | 3  |
| BP | GO:0032835 | glomerulus d    | 4/177  | 62/18723  | 0.00281  | 0.026065 | 0.019471 | ACTA2.  | 4  |
| BP | GO:0010522 | regulation of   | 5/177  | 102/18723 | 0.002839 | 0.026084 | 0.019485 | THY1/C  | 5  |
| BP | GO:0007159 | leukocyte cel   | 10/177 | 371/18723 | 0.002855 | 0.026084 | 0.019485 | THY1/C  | 10 |
| BP | GO:0051384 | response to ζ   | 6/177  | 148/18723 | 0.002858 | 0.026084 | 0.019485 | IGFBP7  | 6  |
| BP | GO:0009743 | response to ϵ   | 8/177  | 253/18723 | 0.002858 | 0.026084 | 0.019485 | COL6A   | 8  |
| BP | GO:0034612 | response to τ   | 8/177  | 253/18723 | 0.002858 | 0.026084 | 0.019485 | COL1A   | 8  |
| BP | GO:2000242 | negative regu   | 4/177  | 63/18723  | 0.002979 | 0.027099 | 0.020243 | TIMP1/  | 4  |
| BP | GO:0071711 | basement me     | 3/177  | 31/18723  | 0.003073 | 0.027856 | 0.020808 | MMP1:   | 3  |
| BP | GO:0002253 | activation of   | 10/177 | 375/18723 | 0.003082 | 0.027856 | 0.020808 | C1S/SE  | 10 |
| BP | GO:0046579 | positive regu   | 4/177  | 64/18723  | 0.003155 | 0.02835  | 0.021178 | COL3A   | 4  |
| BP | GO:0048592 | eye morphog     | 6/177  | 151/18723 | 0.003157 | 0.02835  | 0.021178 | THY1/C  | 6  |
| BP | GO:0030509 | BMP signalin    | 6/177  | 152/18723 | 0.003261 | 0.029197 | 0.02181  | SFRP2/  | 6  |
| BP | GO:0022411 | cellular com    | 11/177 | 443/18723 | 0.003349 | 0.029593 | 0.022106 | CTSK/C  | 11 |
| BP | GO:0010667 | negative regu   | 3/177  | 32/18723  | 0.003368 | 0.029593 | 0.022106 | SFRP2/  | 3  |
| BP | GO:0035767 | endothelial c   | 3/177  | 32/18723  | 0.003368 | 0.029593 | 0.022106 | SMOC2   | 3  |
| BP | GO:0060323 | head morphc     | 3/177  | 32/18723  | 0.003368 | 0.029593 | 0.022106 | COL1A   | 3  |
| BP | GO:0061037 | negative regu   | 3/177  | 32/18723  | 0.003368 | 0.029593 | 0.022106 | CTSK/F  | 3  |
| BP | GO:1901889 | negative regu   | 3/177  | 32/18723  | 0.003368 | 0.029593 | 0.022106 | APOD/   | 3  |
| BP | GO:0007204 | positive regu   | 9/177  | 319/18723 | 0.003406 | 0.029767 | 0.022236 | THY1/C  | 9  |
| BP | GO:0060348 | bone develop    | 7/177  | 205/18723 | 0.003409 | 0.029767 | 0.022236 | COL1A   | 7  |
| BP | GO:0006979 | response to ϵ   | 11/177 | 446/18723 | 0.003524 | 0.030237 | 0.022587 | COL1A   | 11 |
| BP | GO:0045600 | positive regu   | 4/177  | 66/18723  | 0.003527 | 0.030237 | 0.022587 | SFRP2/  | 4  |
| BP | GO:0050766 | positive regu   | 4/177  | 66/18723  | 0.003527 | 0.030237 | 0.022587 | MFGE8   | 4  |
| BP | GO:0050918 | positive chen   | 4/177  | 66/18723  | 0.003527 | 0.030237 | 0.022587 | CXCL12  | 4  |
| BP | GO:0051893 | regulation of   | 4/177  | 66/18723  | 0.003527 | 0.030237 | 0.022587 | APOD/   | 4  |
| BP | GO:0090109 | regulation of   | 4/177  | 66/18723  | 0.003527 | 0.030237 | 0.022587 | APOD/   | 4  |
| BP | GO:0034614 | cellular respc  | 6/177  | 155/18723 | 0.00359  | 0.030605 | 0.022862 | SOD3/   | 6  |
| BP | GO:0003018 | vascular proc   | 8/177  | 263/18723 | 0.003617 | 0.030605 | 0.022862 | SOD3/   | 8  |
| BP | GO:0043588 | skin develop    | 8/177  | 263/18723 | 0.003617 | 0.030605 | 0.022862 | COL1A   | 8  |
| BP | GO:0043010 | camera-type     | 9/177  | 322/18723 | 0.003621 | 0.030605 | 0.022862 | SERPIN  | 9  |
| BP | GO:0034446 | substrate ad    | 5/177  | 108/18723 | 0.003632 | 0.030605 | 0.022862 | FN1/PC  | 5  |
| BP | GO:0022407 | regulation of   | 11/177 | 448/18723 | 0.003644 | 0.030605 | 0.022862 | THY1/C  | 11 |
| BP | GO:0042692 | muscle cell d   | 10/177 | 384/18723 | 0.003645 | 0.030605 | 0.022862 | CXCL9/  | 10 |
| BP | GO:0035025 | positive regu   | 3/177  | 33/18723  | 0.003679 | 0.030622 | 0.022875 | COL3A   | 3  |
| BP | GO:0048048 | embryonic ey    | 3/177  | 33/18723  | 0.003679 | 0.030622 | 0.022875 | FBN1/E  | 3  |
| BP | GO:0070570 | regulation of   | 3/177  | 33/18723  | 0.003679 | 0.030622 | 0.022875 | THY1/F  | 3  |
| BP | GO:0035914 | skeletal musc   | 4/177  | 67/18723  | 0.003723 | 0.030806 | 0.023012 | EGR1/F  | 4  |
| BP | GO:0070527 | platelet aggr   | 4/177  | 67/18723  | 0.003723 | 0.030806 | 0.023012 | MYL9/F  | 4  |
| BP | GO:0043281 | regulation of   | 7/177  | 209/18723 | 0.00379  | 0.030938 | 0.023111 | SFRP2/  | 7  |
| BP | GO:0061299 | retina vascul   | 2/177  | 10/18723  | 0.003805 | 0.030938 | 0.023111 | CYP1B:  | 2  |
| BP | GO:0072203 | cell proliferat | 2/177  | 10/18723  | 0.003805 | 0.030938 | 0.023111 | PDGFR   | 2  |
| BP | GO:0072378 | blood coagul    | 2/177  | 10/18723  | 0.003805 | 0.030938 | 0.023111 | FN1/FE  | 2  |

|    |            |                |        |           |          |          |          |         |    |
|----|------------|----------------|--------|-----------|----------|----------|----------|---------|----|
| BP | GO:0097278 | complement     | 2/177  | 10/18723  | 0.003805 | 0.030938 | 0.023111 | C3/CFH  | 2  |
| BP | GO:2000425 | regulation of  | 2/177  | 10/18723  | 0.003805 | 0.030938 | 0.023111 | C3/CCI  | 2  |
| BP | GO:0051017 | actin filament | 6/177  | 157/18723 | 0.003823 | 0.030999 | 0.023156 | CALD1   | 6  |
| BP | GO:0046686 | response to    | 4/177  | 68/18723  | 0.003927 | 0.031667 | 0.023656 | SPARC   | 4  |
| BP | GO:0009408 | response to    | 5/177  | 110/18723 | 0.003928 | 0.031667 | 0.023656 | IGFBP7  | 5  |
| BP | GO:0051235 | maintenance    | 9/177  | 327/18723 | 0.004004 | 0.032193 | 0.024049 | THY1/C  | 9  |
| BP | GO:0014066 | regulation of  | 5/177  | 111/18723 | 0.004082 | 0.032727 | 0.024447 | DCN/FI  | 5  |
| BP | GO:0043523 | regulation of  | 7/177  | 212/18723 | 0.004097 | 0.03275  | 0.024464 | CCL2/M  | 7  |
| BP | GO:0060402 | calcium ion    | 6/177  | 160/18723 | 0.004193 | 0.033424 | 0.024968 | THY1/C  | 6  |
| BP | GO:0051651 | maintenance    | 7/177  | 214/18723 | 0.004311 | 0.034065 | 0.025447 | THY1/C  | 7  |
| BP | GO:0061572 | actin filament | 6/177  | 161/18723 | 0.004322 | 0.034065 | 0.025447 | CALD1   | 6  |
| BP | GO:0019216 | regulation of  | 9/177  | 331/18723 | 0.004333 | 0.034065 | 0.025447 | APOD/   | 9  |
| BP | GO:0071214 | cellular resp  | 9/177  | 331/18723 | 0.004333 | 0.034065 | 0.025447 | TIMP1/  | 9  |
| BP | GO:0104004 | cellular resp  | 9/177  | 331/18723 | 0.004333 | 0.034065 | 0.025447 | TIMP1/  | 9  |
| BP | GO:0010664 | negative regu  | 3/177  | 35/18723  | 0.004353 | 0.034128 | 0.025494 | SFRP2/  | 3  |
| BP | GO:0071347 | cellular resp  | 5/177  | 113/18723 | 0.004404 | 0.034431 | 0.02572  | CCL19/  | 5  |
| BP | GO:0007601 | visual percep  | 7/177  | 215/18723 | 0.004422 | 0.034474 | 0.025752 | COL1A   | 7  |
| BP | GO:0150116 | regulation of  | 4/177  | 71/18723  | 0.004584 | 0.035161 | 0.026266 | APOD/   | 4  |
| BP | GO:0002604 | regulation of  | 2/177  | 11/18723  | 0.004621 | 0.035161 | 0.026266 | CCL19/  | 2  |
| BP | GO:0014820 | tonic smooth   | 2/177  | 11/18723  | 0.004621 | 0.035161 | 0.026266 | MYLK/I  | 2  |
| BP | GO:0043589 | skin morpho    | 2/177  | 11/18723  | 0.004621 | 0.035161 | 0.026266 | COL1A   | 2  |
| BP | GO:0071492 | cellular resp  | 2/177  | 11/18723  | 0.004621 | 0.035161 | 0.026266 | TIMP1/  | 2  |
| BP | GO:0072110 | glomerular r   | 2/177  | 11/18723  | 0.004621 | 0.035161 | 0.026266 | PDGFR   | 2  |
| BP | GO:0097048 | dendritic cell | 2/177  | 11/18723  | 0.004621 | 0.035161 | 0.026266 | CCL19/  | 2  |
| BP | GO:2000343 | positive regu  | 2/177  | 11/18723  | 0.004621 | 0.035161 | 0.026266 | POSTN   | 2  |
| BP | GO:2000668 | regulation of  | 2/177  | 11/18723  | 0.004621 | 0.035161 | 0.026266 | CCL19/  | 2  |
| BP | GO:0002691 | regulation of  | 3/177  | 36/18723  | 0.004716 | 0.035789 | 0.026734 | THY1/C  | 3  |
| BP | GO:0051209 | release of sec | 5/177  | 115/18723 | 0.004743 | 0.035898 | 0.026816 | THY1/C  | 5  |
| BP | GO:1903037 | regulation of  | 9/177  | 336/18723 | 0.004773 | 0.035988 | 0.026883 | THY1/C  | 9  |
| BP | GO:0033627 | cell adhesion  | 4/177  | 72/18723  | 0.004819 | 0.035988 | 0.026883 | SFRP2/  | 4  |
| BP | GO:0042246 | tissue regene  | 4/177  | 72/18723  | 0.004819 | 0.035988 | 0.026883 | APOD/   | 4  |
| BP | GO:0043903 | regulation of  | 4/177  | 72/18723  | 0.004819 | 0.035988 | 0.026883 | IFITM3, | 4  |
| BP | GO:0051057 | positive regu  | 4/177  | 72/18723  | 0.004819 | 0.035988 | 0.026883 | COL3A   | 4  |
| BP | GO:0062197 | cellular resp  | 9/177  | 337/18723 | 0.004865 | 0.036008 | 0.026898 | SOD3/   | 9  |
| BP | GO:0071772 | response to    | 6/177  | 165/18723 | 0.004867 | 0.036008 | 0.026898 | SFRP2/  | 6  |
| BP | GO:0071773 | cellular resp  | 6/177  | 165/18723 | 0.004867 | 0.036008 | 0.026898 | SFRP2/  | 6  |
| BP | GO:0034764 | positive regu  | 7/177  | 219/18723 | 0.004885 | 0.036008 | 0.026898 | THY1/C  | 7  |
| BP | GO:0050953 | sensory perc   | 7/177  | 219/18723 | 0.004885 | 0.036008 | 0.026898 | COL1A   | 7  |
| BP | GO:0051283 | negative regu  | 5/177  | 116/18723 | 0.00492  | 0.036173 | 0.027022 | THY1/C  | 5  |
| BP | GO:0030307 | positive regu  | 6/177  | 166/18723 | 0.005011 | 0.036745 | 0.027449 | FN1/SF  | 6  |
| BP | GO:0061035 | regulation of  | 4/177  | 73/18723  | 0.005061 | 0.036924 | 0.027582 | CTSK/F  | 4  |
| BP | GO:1904427 | positive regu  | 4/177  | 73/18723  | 0.005061 | 0.036924 | 0.027582 | THY1/C  | 4  |
| BP | GO:0032570 | response to    | 3/177  | 37/18723  | 0.005097 | 0.036997 | 0.027637 | FOS/C/  | 3  |
| BP | GO:0040036 | regulation of  | 3/177  | 37/18723  | 0.005097 | 0.036997 | 0.027637 | SULF1/  | 3  |
| BP | GO:0008406 | gonad devel    | 7/177  | 221/18723 | 0.00513  | 0.037138 | 0.027743 | SFRP2/  | 7  |
| BP | GO:0022612 | gland morph    | 5/177  | 118/18723 | 0.005287 | 0.038082 | 0.028447 | IGFBP5  | 5  |
| BP | GO:0051282 | regulation of  | 5/177  | 118/18723 | 0.005287 | 0.038082 | 0.028447 | THY1/C  | 5  |
| BP | GO:0019221 | cytokine-me    | 11/177 | 472/18723 | 0.005366 | 0.038474 | 0.02874  | CXCL9/  | 11 |
| BP | GO:0010959 | regulation of  | 10/177 | 406/18723 | 0.005368 | 0.038474 | 0.02874  | THY1/C  | 10 |
| BP | GO:0007614 | short-term r   | 2/177  | 12/18723  | 0.005511 | 0.038715 | 0.02892  | SERPIN  | 2  |
| BP | GO:0010642 | negative regu  | 2/177  | 12/18723  | 0.005511 | 0.038715 | 0.02892  | APOD/   | 2  |
| BP | GO:0032908 | regulation of  | 2/177  | 12/18723  | 0.005511 | 0.038715 | 0.02892  | LUM/TI  | 2  |
| BP | GO:0045916 | negative regu  | 2/177  | 12/18723  | 0.005511 | 0.038715 | 0.02892  | SERPIN  | 2  |
| BP | GO:0060394 | negative regu  | 2/177  | 12/18723  | 0.005511 | 0.038715 | 0.02892  | LRP1/E  | 2  |
| BP | GO:0061430 | bone trabecu   | 2/177  | 12/18723  | 0.005511 | 0.038715 | 0.02892  | COL1A   | 2  |
| BP | GO:0072376 | protein activ  | 2/177  | 12/18723  | 0.005511 | 0.038715 | 0.02892  | FN1/FE  | 2  |
| BP | GO:0090177 | establishmen   | 2/177  | 12/18723  | 0.005511 | 0.038715 | 0.02892  | SFRP2/  | 2  |
| BP | GO:0048662 | negative regu  | 4/177  | 75/18723  | 0.00557  | 0.039032 | 0.029157 | APOD/   | 4  |

|    |            |                |        |          |          |          |          |        |    |
|----|------------|----------------|--------|----------|----------|----------|----------|--------|----|
| BP | GO:0051146 | striated musc  | 8/177  | 283/1872 | 0.005594 | 0.039103 | 0.02921  | CXCL9/ | 8  |
| BP | GO:0034284 | response to r  | 7/177  | 225/1872 | 0.005647 | 0.039377 | 0.029415 | COL6A  | 7  |
| BP | GO:0048675 | axon extensio  | 5/177  | 120/1872 | 0.005673 | 0.03946  | 0.029477 | FN1/C  | 5  |
| BP | GO:0003206 | cardiac cham   | 5/177  | 121/1872 | 0.005873 | 0.040753 | 0.030443 | SFRP2/ | 5  |
| BP | GO:0010463 | mesenchyma     | 3/177  | 39/1872  | 0.005913 | 0.040878 | 0.030536 | PRRX1/ | 3  |
| BP | GO:0045137 | development    | 7/177  | 227/1872 | 0.00592  | 0.040878 | 0.030536 | SFRP2/ | 7  |
| BP | GO:1990138 | neuron proje   | 6/177  | 172/1872 | 0.00594  | 0.040919 | 0.030566 | FN1/PC | 6  |
| BP | GO:0043410 | positive regu  | 11/177 | 480/1872 | 0.006065 | 0.041567 | 0.031051 | IGFBP4 | 11 |
| BP | GO:0019730 | antimicrobial  | 5/177  | 122/1872 | 0.006078 | 0.041567 | 0.031051 | CXCL9/ | 5  |
| BP | GO:0051208 | sequestering   | 5/177  | 122/1872 | 0.006078 | 0.041567 | 0.031051 | THY1/C | 5  |
| BP | GO:0071356 | cellular resp  | 7/177  | 229/1872 | 0.006203 | 0.042315 | 0.03161  | COL1A  | 7  |
| BP | GO:0007584 | response to r  | 6/177  | 174/1872 | 0.006276 | 0.042716 | 0.031909 | COL1A  | 6  |
| BP | GO:0045777 | positive regu  | 3/177  | 40/1872  | 0.006349 | 0.043003 | 0.032123 | RARRE  | 3  |
| BP | GO:0071276 | cellular resp  | 3/177  | 40/1872  | 0.006349 | 0.043003 | 0.032123 | FOS/JU | 3  |
| BP | GO:0043154 | negative regu  | 4/177  | 78/1872  | 0.006396 | 0.043021 | 0.032137 | SFRP2/ | 4  |
| BP | GO:0061045 | negative regu  | 4/177  | 78/1872  | 0.006396 | 0.043021 | 0.032137 | SERPIN | 4  |
| BP | GO:0001768 | establishmen   | 2/177  | 13/1872  | 0.006473 | 0.043021 | 0.032137 | CCL19/ | 2  |
| BP | GO:0014745 | negative regu  | 2/177  | 13/1872  | 0.006473 | 0.043021 | 0.032137 | IGFBP5 | 2  |
| BP | GO:0032905 | transforming   | 2/177  | 13/1872  | 0.006473 | 0.043021 | 0.032137 | LUM/TI | 2  |
| BP | GO:0036462 | TRAIL-activa   | 2/177  | 13/1872  | 0.006473 | 0.043021 | 0.032137 | TIMP3/ | 2  |
| BP | GO:1903054 | negative regu  | 2/177  | 13/1872  | 0.006473 | 0.043021 | 0.032137 | CST3/E | 2  |
| BP | GO:2001198 | regulation of  | 2/177  | 13/1872  | 0.006473 | 0.043021 | 0.032137 | TMEM1  | 2  |
| BP | GO:0051480 | regulation of  | 9/177  | 353/1872 | 0.006536 | 0.043336 | 0.032372 | THY1/C | 9  |
| BP | GO:0072503 | cellular dival | 11/177 | 486/1872 | 0.006635 | 0.043837 | 0.032747 | THY1/C | 11 |
| BP | GO:0010594 | regulation of  | 7/177  | 232/1872 | 0.006645 | 0.043837 | 0.032747 | DCN/S  | 7  |
| BP | GO:0006029 | proteoglycan   | 4/177  | 79/1872  | 0.006688 | 0.043837 | 0.032747 | BGN/D  | 4  |
| BP | GO:0050772 | positive regu  | 4/177  | 79/1872  | 0.006688 | 0.043837 | 0.032747 | FN1/C  | 4  |
| BP | GO:0051279 | regulation of  | 4/177  | 79/1872  | 0.006688 | 0.043837 | 0.032747 | THY1/C | 4  |
| BP | GO:0010632 | regulation of  | 8/177  | 292/1872 | 0.006715 | 0.043909 | 0.0328   | DCN/S  | 8  |
| BP | GO:0050867 | positive regu  | 10/177 | 420/1872 | 0.006761 | 0.044111 | 0.032951 | THY1/C | 10 |
| BP | GO:0071634 | regulation of  | 3/177  | 41/1872  | 0.006803 | 0.044202 | 0.033019 | LUM/FI | 3  |
| BP | GO:0030324 | lung develop   | 6/177  | 177/1872 | 0.006806 | 0.044202 | 0.033019 | SPARC  | 6  |
| BP | GO:2001235 | positive regu  | 5/177  | 126/1872 | 0.00695  | 0.044849 | 0.033502 | TIMP3/ | 5  |
| BP | GO:0048588 | development    | 7/177  | 234/1872 | 0.006953 | 0.044849 | 0.033502 | FN1/PC | 7  |
| BP | GO:0060560 | development    | 7/177  | 234/1872 | 0.006953 | 0.044849 | 0.033502 | FN1/SF | 7  |
| BP | GO:0048145 | regulation of  | 4/177  | 80/1872  | 0.006989 | 0.044881 | 0.033526 | FN1/PC | 4  |
| BP | GO:0009266 | response to t  | 6/177  | 178/1872 | 0.00699  | 0.044881 | 0.033526 | IGFBP7 | 6  |
| BP | GO:2000116 | regulation of  | 7/177  | 235/1872 | 0.007111 | 0.045557 | 0.034031 | SFRP2/ | 7  |
| BP | GO:0030048 | actin filamen  | 5/177  | 127/1872 | 0.00718  | 0.045889 | 0.034279 | GSN/TI | 5  |
| BP | GO:1901653 | cellular resp  | 9/177  | 359/1872 | 0.007264 | 0.045889 | 0.034279 | RARRE  | 9  |
| BP | GO:0048762 | mesenchyma     | 7/177  | 236/1872 | 0.007272 | 0.045889 | 0.034279 | COL1A  | 7  |
| BP | GO:0014912 | negative regu  | 3/177  | 42/1872  | 0.007276 | 0.045889 | 0.034279 | IGFBP5 | 3  |
| BP | GO:0046596 | regulation of  | 3/177  | 42/1872  | 0.007276 | 0.045889 | 0.034279 | IFITM3 | 3  |
| BP | GO:1902895 | positive regu  | 3/177  | 42/1872  | 0.007276 | 0.045889 | 0.034279 | EGR1/F | 3  |
| BP | GO:2000404 | regulation of  | 3/177  | 42/1872  | 0.007276 | 0.045889 | 0.034279 | APOD/  | 3  |
| BP | GO:0048144 | fibroblast pr  | 4/177  | 81/1872  | 0.007299 | 0.045933 | 0.034312 | FN1/PC | 4  |
| BP | GO:0032612 | interleukin-1  | 5/177  | 128/1872 | 0.007416 | 0.046404 | 0.034664 | CCL19/ | 5  |
| BP | GO:0032652 | regulation of  | 5/177  | 128/1872 | 0.007416 | 0.046404 | 0.034664 | CCL19/ | 5  |
| BP | GO:0001767 | establishmen   | 2/177  | 14/1872  | 0.007505 | 0.046404 | 0.034664 | CCL19/ | 2  |
| BP | GO:0003214 | cardiac left v | 2/177  | 14/1872  | 0.007505 | 0.046404 | 0.034664 | SFRP2/ | 2  |
| BP | GO:0010838 | positive regu  | 2/177  | 14/1872  | 0.007505 | 0.046404 | 0.034664 | MDK/F  | 2  |
| BP | GO:0035791 | platelet-deriv | 2/177  | 14/1872  | 0.007505 | 0.046404 | 0.034664 | PDGFR  | 2  |
| BP | GO:0050930 | induction of   | 2/177  | 14/1872  | 0.007505 | 0.046404 | 0.034664 | CXCL12 | 2  |
| BP | GO:0070141 | response to l  | 2/177  | 14/1872  | 0.007505 | 0.046404 | 0.034664 | TIMP1/ | 2  |
| BP | GO:0048511 | rhythmic pro   | 8/177  | 298/1872 | 0.007551 | 0.046454 | 0.034701 | SERPIN | 8  |
| BP | GO:0048568 | embryonic or   | 10/177 | 427/1872 | 0.007555 | 0.046454 | 0.034701 | RARRE  | 10 |
| BP | GO:0030323 | respiratory tu | 6/177  | 181/1872 | 0.007562 | 0.046454 | 0.034701 | SPARC  | 6  |
| BP | GO:0008543 | fibroblast gr  | 4/177  | 82/1872  | 0.007618 | 0.046596 | 0.034807 | SULF1/ | 4  |



|    |            |                |        |           |          |          |          |        |    |
|----|------------|----------------|--------|-----------|----------|----------|----------|--------|----|
| BP | GO:0008625 | extrinsic apo  | 4/177  | 82/18723  | 0.007618 | 0.046596 | 0.034807 | SFRP2/ | 4  |
| BP | GO:0060401 | cytosolic calc | 6/177  | 182/18723 | 0.00776  | 0.046908 | 0.03504  | THY1/C | 6  |
| BP | GO:0061138 | morphogene     | 6/177  | 182/18723 | 0.00776  | 0.046908 | 0.03504  | SFRP2/ | 6  |
| BP | GO:0006509 | membrane p     | 3/177  | 43/18723  | 0.007768 | 0.046908 | 0.03504  | TIMP1/ | 3  |
| BP | GO:0010171 | body morph     | 3/177  | 43/18723  | 0.007768 | 0.046908 | 0.03504  | COL1A  | 3  |
| BP | GO:0061383 | trabecula mo   | 3/177  | 43/18723  | 0.007768 | 0.046908 | 0.03504  | COL1A  | 3  |
| BP | GO:0071604 | transforming   | 3/177  | 43/18723  | 0.007768 | 0.046908 | 0.03504  | LUM/FI | 3  |
| BP | GO:0048678 | response to ε  | 4/177  | 83/18723  | 0.007946 | 0.047778 | 0.03569  | APOD/  | 4  |
| BP | GO:0051899 | membrane d     | 4/177  | 83/18723  | 0.007946 | 0.047778 | 0.03569  | DCN/JL | 4  |
| BP | GO:0046683 | response to ϵ  | 5/177  | 131/18723 | 0.008157 | 0.048941 | 0.03656  | COL1A  | 5  |
| BP | GO:0031295 | T cell costim  | 3/177  | 44/18723  | 0.00828  | 0.049282 | 0.036814 | CCL19/ | 3  |
| BP | GO:0060324 | face develop   | 3/177  | 44/18723  | 0.00828  | 0.049282 | 0.036814 | COL1A  | 3  |
| BP | GO:0010660 | regulation of  | 4/177  | 84/18723  | 0.008283 | 0.049282 | 0.036814 | SFRP2/ | 4  |
| BP | GO:0042310 | vasoconstrict  | 4/177  | 84/18723  | 0.008283 | 0.049282 | 0.036814 | ACTA2. | 4  |
| BP | GO:0045667 | regulation of  | 5/177  | 132/18723 | 0.008415 | 0.049961 | 0.037321 | SFRP2/ | 5  |
| BP | GO:0043123 | positive regu  | 6/177  | 186/18723 | 0.00859  | 0.050256 | 0.037542 | CCL19/ | 6  |
| BP | GO:0002468 | dendritic cell | 2/177  | 15/18723  | 0.008606 | 0.050256 | 0.037542 | CCL19/ | 2  |
| BP | GO:0010713 | negative regu  | 2/177  | 15/18723  | 0.008606 | 0.050256 | 0.037542 | CST3/E | 2  |
| BP | GO:0042249 | establishmen   | 2/177  | 15/18723  | 0.008606 | 0.050256 | 0.037542 | SFRP2/ | 2  |
| BP | GO:0060026 | convergent e   | 2/177  | 15/18723  | 0.008606 | 0.050256 | 0.037542 | SFRP2/ | 2  |
| BP | GO:0072224 | metanephric    | 2/177  | 15/18723  | 0.008606 | 0.050256 | 0.037542 | PDGFR  | 2  |
| BP | GO:1901741 | positive regu  | 2/177  | 15/18723  | 0.008606 | 0.050256 | 0.037542 | CXCL9/ | 2  |
| BP | GO:2000402 | negative regu  | 2/177  | 15/18723  | 0.008606 | 0.050256 | 0.037542 | APOD/  | 2  |
| BP | GO:0001656 | metanephros    | 4/177  | 85/18723  | 0.008629 | 0.050288 | 0.037565 | PDGFR  | 4  |
| BP | GO:1904646 | cellular resp  | 3/177  | 45/18723  | 0.00881  | 0.051237 | 0.038274 | LRP1/V | 3  |
| BP | GO:0035023 | regulation of  | 4/177  | 86/18723  | 0.008985 | 0.052039 | 0.038874 | COL3A  | 4  |
| BP | GO:2000117 | negative regu  | 4/177  | 86/18723  | 0.008985 | 0.052039 | 0.038874 | SFRP2/ | 4  |
| BP | GO:0031668 | cellular resp  | 7/177  | 246/18723 | 0.009028 | 0.052078 | 0.038903 | COL1A  | 7  |
| BP | GO:0051402 | neuron apop    | 7/177  | 246/18723 | 0.009028 | 0.052078 | 0.038903 | CCL2/M | 7  |
| BP | GO:0045862 | positive regu  | 9/177  | 372/18723 | 0.009056 | 0.052133 | 0.038944 | FN1/SF | 9  |
| BP | GO:0010038 | response to r  | 9/177  | 373/18723 | 0.009207 | 0.052893 | 0.039511 | SOD3/! | 9  |
| BP | GO:0046578 | regulation of  | 6/177  | 189/18723 | 0.009253 | 0.053053 | 0.039631 | COL3A  | 6  |
| BP | GO:1901879 | regulation of  | 4/177  | 87/18723  | 0.00935  | 0.053237 | 0.039768 | GSN/M  | 4  |
| BP | GO:0001974 | blood vessel   | 3/177  | 46/18723  | 0.009361 | 0.053237 | 0.039768 | BGN/C  | 3  |
| BP | GO:0031294 | lymphocyte c   | 3/177  | 46/18723  | 0.009361 | 0.053237 | 0.039768 | CCL19/ | 3  |
| BP | GO:0043462 | regulation of  | 3/177  | 46/18723  | 0.009361 | 0.053237 | 0.039768 | TPM2/  | 3  |
| BP | GO:0007015 | actin filamen  | 10/177 | 442/18723 | 0.009499 | 0.053919 | 0.040278 | CALD1. | 10 |
| BP | GO:0045926 | negative regu  | 7/177  | 249/18723 | 0.009611 | 0.054445 | 0.040671 | SFRP2/ | 7  |
| BP | GO:0002693 | positive regu  | 2/177  | 16/18723  | 0.009775 | 0.054688 | 0.040853 | THY1/M | 2  |
| BP | GO:0002921 | negative regu  | 2/177  | 16/18723  | 0.009775 | 0.054688 | 0.040853 | SERPIN | 2  |
| BP | GO:0003084 | positive regu  | 2/177  | 16/18723  | 0.009775 | 0.054688 | 0.040853 | RARRE! | 2  |
| BP | GO:0044849 | estrous cycle  | 2/177  | 16/18723  | 0.009775 | 0.054688 | 0.040853 | EGR1/M | 2  |
| BP | GO:0051014 | actin filamen  | 2/177  | 16/18723  | 0.009775 | 0.054688 | 0.040853 | GSN/D  | 2  |
| BP | GO:0007266 | Rho protein ϵ  | 5/177  | 137/18723 | 0.009789 | 0.054688 | 0.040853 | COL1A  | 5  |
| BP | GO:0010977 | negative regu  | 5/177  | 137/18723 | 0.009789 | 0.054688 | 0.040853 | THY1/L | 5  |
| BP | GO:0048483 | autonomic n    | 3/177  | 47/18723  | 0.00993  | 0.055152 | 0.041198 | FN1/EE | 3  |
| BP | GO:0090279 | regulation of  | 3/177  | 47/18723  | 0.00993  | 0.055152 | 0.041198 | PDGFR  | 3  |
| BP | GO:0097028 | dendritic cell | 3/177  | 47/18723  | 0.00993  | 0.055152 | 0.041198 | CCL19/ | 3  |
| BP | GO:0010657 | muscle cell a  | 4/177  | 89/18723  | 0.010109 | 0.056032 | 0.041856 | SFRP2/ | 4  |
| BP | GO:0090257 | regulation of  | 7/177  | 252/18723 | 0.010222 | 0.056547 | 0.042241 | MYL9/I | 7  |
| BP | GO:0006874 | cellular calci | 10/177 | 448/18723 | 0.010376 | 0.057291 | 0.042797 | THY1/C | 10 |
| BP | GO:0097305 | response to ε  | 7/177  | 253/18723 | 0.010431 | 0.057482 | 0.042939 | IGFBP7 | 7  |
| BP | GO:0048146 | positive regu  | 3/177  | 48/18723  | 0.01052  | 0.05786  | 0.043222 | FN1/PC | 3  |
| BP | GO:0001763 | morphogene     | 6/177  | 196/18723 | 0.010941 | 0.059945 | 0.044779 | SFRP2/ | 6  |
| BP | GO:0006006 | glucose met    | 6/177  | 196/18723 | 0.010941 | 0.059945 | 0.044779 | APOD/  | 6  |
| BP | GO:0010566 | regulation of  | 2/177  | 17/18723  | 0.01101  | 0.060089 | 0.044887 | EGR1/E | 2  |
| BP | GO:0010715 | regulation of  | 2/177  | 17/18723  | 0.01101  | 0.060089 | 0.044887 | CST3/L | 2  |
| BP | GO:0042326 | negative regu  | 9/177  | 385/18723 | 0.011165 | 0.06082  | 0.045433 | SFRP2/ | 9  |

|    |            |                 |        |           |          |          |          |        |    |
|----|------------|-----------------|--------|-----------|----------|----------|----------|--------|----|
| BP | GO:0097553 | calcium ion t   | 5/177  | 142/18723 | 0.011311 | 0.061494 | 0.045936 | THY1/C | 5  |
| BP | GO:0070555 | response to i   | 5/177  | 143/18723 | 0.011633 | 0.063126 | 0.047156 | CCL19/ | 5  |
| BP | GO:0033273 | response to v   | 4/177  | 93/18723  | 0.011743 | 0.063325 | 0.047304 | COL1A  | 4  |
| BP | GO:0002448 | mast cell mec   | 3/177  | 50/18723  | 0.011759 | 0.063325 | 0.047304 | PTGDS. | 3  |
| BP | GO:0010665 | regulation of   | 3/177  | 50/18723  | 0.011759 | 0.063325 | 0.047304 | SFRP2/ | 3  |
| BP | GO:0060688 | regulation of   | 3/177  | 50/18723  | 0.011759 | 0.063325 | 0.047304 | SULF1/ | 3  |
| BP | GO:0014065 | phosphatidyl    | 5/177  | 144/18723 | 0.011962 | 0.064296 | 0.048029 | DCN/FI | 5  |
| BP | GO:0002544 | chronic inflar  | 2/177  | 18/18723  | 0.01231  | 0.065813 | 0.049162 | THBS1/ | 2  |
| BP | GO:0097709 | connective ti   | 2/177  | 18/18723  | 0.01231  | 0.065813 | 0.049162 | TIMP1/ | 2  |
| BP | GO:0055074 | calcium ion h   | 10/177 | 460/18723 | 0.012314 | 0.065813 | 0.049162 | THY1/C | 10 |
| BP | GO:0009636 | response to t   | 7/177  | 262/18723 | 0.01246  | 0.066468 | 0.049652 | SOD3/I | 7  |
| BP | GO:0008585 | female gonad    | 4/177  | 95/18723  | 0.012621 | 0.066669 | 0.049802 | NR2F2/ | 4  |
| BP | GO:0030516 | regulation of   | 4/177  | 95/18723  | 0.012621 | 0.066669 | 0.049802 | FN1/C) | 4  |
| BP | GO:0045666 | positive regu   | 4/177  | 95/18723  | 0.012621 | 0.066669 | 0.049802 | CXCL12 | 4  |
| BP | GO:0050764 | regulation of   | 4/177  | 95/18723  | 0.012621 | 0.066669 | 0.049802 | MFGE8  | 4  |
| BP | GO:0010675 | regulation of   | 5/177  | 146/18723 | 0.012638 | 0.066669 | 0.049802 | IGFBP4 | 5  |
| BP | GO:0042542 | response to h   | 5/177  | 146/18723 | 0.012638 | 0.066669 | 0.049802 | COL1A  | 5  |
| CC | GO:0062023 | collagen-cor    | 64/180 | 425/19550 | 1.57E-60 | 3.68E-58 | 2.81E-58 | TIMP1/ | 64 |
| CC | GO:0005788 | endoplasmic     | 32/180 | 313/19550 | 2.56E-24 | 3.00E-22 | 2.29E-22 | TIMP1/ | 32 |
| CC | GO:0005581 | collagen trim   | 18/180 | 87/19550  | 1.06E-19 | 8.23E-18 | 6.30E-18 | COL1A  | 18 |
| CC | GO:0005604 | basement me     | 17/180 | 96/19550  | 1.89E-17 | 1.11E-15 | 8.46E-16 | TIMP1/ | 17 |
| CC | GO:0098644 | complex of c    | 8/180  | 21/19550  | 8.12E-12 | 3.80E-10 | 2.90E-10 | COL1A  | 8  |
| CC | GO:0005583 | fibrillar colla | 6/180  | 12/19550  | 4.95E-10 | 1.57E-08 | 1.20E-08 | COL1A  | 6  |
| CC | GO:0098643 | banded colla    | 6/180  | 12/19550  | 4.95E-10 | 1.57E-08 | 1.20E-08 | COL1A  | 6  |
| CC | GO:0031093 | platelet alph   | 10/180 | 67/19550  | 5.37E-10 | 1.57E-08 | 1.20E-08 | TIMP1/ | 10 |
| CC | GO:0031091 | platelet alph   | 11/180 | 91/19550  | 7.41E-10 | 1.93E-08 | 1.47E-08 | TIMP1/ | 11 |
| CC | GO:0034774 | secretory gra   | 18/180 | 322/19550 | 1.14E-09 | 2.66E-08 | 2.03E-08 | TIMP1/ | 18 |
| CC | GO:0060205 | cytoplasmic v   | 18/180 | 325/19550 | 1.32E-09 | 2.80E-08 | 2.14E-08 | TIMP1/ | 18 |
| CC | GO:0031983 | vesicle lumer   | 18/180 | 327/19550 | 1.45E-09 | 2.83E-08 | 2.16E-08 | TIMP1/ | 18 |
| CC | GO:0043292 | contractile fil | 12/180 | 239/19550 | 2.30E-06 | 4.14E-05 | 3.16E-05 | MYL9/C | 12 |
| CC | GO:0001527 | microfibril     | 4/180  | 12/19550  | 3.25E-06 | 5.43E-05 | 4.15E-05 | MFAP4  | 4  |
| CC | GO:0031089 | platelet dens   | 4/180  | 14/19550  | 6.47E-06 | 0.000101 | 7.72E-05 | LGALS3 | 4  |
| CC | GO:0072562 | blood microv    | 9/180  | 146/19550 | 8.52E-06 | 0.000124 | 9.47E-05 | C1S/SE | 9  |
| CC | GO:0032432 | actin filamen   | 7/180  | 80/19550  | 9.00E-06 | 0.000124 | 9.47E-05 | MYL9/F | 7  |
| CC | GO:0030016 | myofibril       | 11/180 | 231/19550 | 1.01E-05 | 0.000132 | 0.000101 | MYL9/C | 11 |
| CC | GO:0005925 | focal adhesio   | 14/180 | 418/19550 | 3.44E-05 | 0.000423 | 0.000324 | THY1/F | 14 |
| CC | GO:0042827 | platelet dens   | 4/180  | 21/19550  | 3.68E-05 | 0.000431 | 0.000329 | LGALS3 | 4  |
| CC | GO:0030055 | cell-substrate  | 14/180 | 425/19550 | 4.12E-05 | 0.000451 | 0.000345 | THY1/F | 14 |
| CC | GO:0042383 | sarcolemma      | 8/180  | 138/19550 | 4.24E-05 | 0.000451 | 0.000345 | BGN/C  | 8  |
| CC | GO:0001725 | stress fiber    | 6/180  | 71/19550  | 4.89E-05 | 0.000477 | 0.000364 | MYL9/F | 6  |
| CC | GO:0097517 | contractile ac  | 6/180  | 71/19550  | 4.89E-05 | 0.000477 | 0.000364 | MYL9/F | 6  |
| CC | GO:0042641 | actomyosin      | 6/180  | 81/19550  | 0.000103 | 0.000961 | 0.000735 | MYL9/F | 6  |
| CC | GO:0030017 | sarcomere       | 9/180  | 211/19550 | 0.000152 | 0.00137  | 0.001048 | MYL9/F | 9  |
| CC | GO:0043202 | lysosomal lur   | 6/180  | 97/19550  | 0.000277 | 0.0024   | 0.001835 | BGN/D  | 6  |
| CC | GO:0005796 | Golgi lumen     | 6/180  | 104/19550 | 0.000403 | 0.00337  | 0.002577 | BGN/D  | 6  |
| CC | GO:0045121 | membrane r      | 10/180 | 335/19550 | 0.001117 | 0.008716 | 0.006665 | THY1/F | 10 |
| CC | GO:0098857 | membrane r      | 10/180 | 335/19550 | 0.001117 | 0.008716 | 0.006665 | THY1/F | 10 |
| CC | GO:0005775 | vacuolar lum    | 7/180  | 174/19550 | 0.001166 | 0.0088   | 0.00673  | BGN/D  | 7  |
| CC | GO:0030018 | Z disc          | 6/180  | 130/19550 | 0.001302 | 0.009523 | 0.007283 | MYL9/F | 6  |
| CC | GO:0031674 | I band          | 6/180  | 141/19550 | 0.00197  | 0.013968 | 0.010682 | MYL9/F | 6  |
| CC | GO:0002102 | podosome        | 3/180  | 29/19550  | 0.002352 | 0.016186 | 0.012378 | GSN/P, | 3  |
| CC | GO:0005614 | interstitial m  | 2/180  | 10/19550  | 0.003614 | 0.02349  | 0.017963 | CCDC8  | 2  |
| CC | GO:0032593 | insulin-respo   | 2/180  | 10/19550  | 0.003614 | 0.02349  | 0.017963 | LRP1/R | 2  |
| CC | GO:0005884 | actin filamen   | 5/180  | 114/19550 | 0.004095 | 0.025899 | 0.019806 | TPM2/  | 5  |
| CC | GO:0009897 | external side   | 10/180 | 421/19550 | 0.00576  | 0.034851 | 0.026652 | CTSK/T | 10 |
| CC | GO:1904813 | ficolin-1-rich  | 5/180  | 124/19550 | 0.005837 | 0.034851 | 0.026652 | GSN/C  | 5  |
| CC | GO:0030426 | growth cone     | 6/180  | 177/19550 | 0.006016 | 0.034851 | 0.026652 | THY1/F | 6  |
| CC | GO:0030864 | cortical actin  | 4/180  | 79/19550  | 0.006106 | 0.034851 | 0.026652 | CALD1  | 4  |

|    |            |                 |         |           |          |          |          |        |    |
|----|------------|-----------------|---------|-----------|----------|----------|----------|--------|----|
| CC | GO:0030427 | site of polariz | 6/180   | 183/19550 | 0.007046 | 0.039256 | 0.03002  | THY1/F | 6  |
| CC | GO:0005901 | caveola         | 4/180   | 84/19550  | 0.007569 | 0.041191 | 0.0315   | TFPI/C | 4  |
| MF | GO:0005201 | extracellular   | 141/175 | 172/18368 | 2.58E-46 | 7.68E-44 | 6.37E-44 | COL1A  | 41 |
| MF | GO:0005539 | glycosaminogly  | 24/175  | 230/18368 | 2.63E-18 | 3.91E-16 | 3.24E-16 | BGN/D  | 24 |
| MF | GO:0030020 | extracellular   | 13/175  | 41/18368  | 4.74E-17 | 4.70E-15 | 3.89E-15 | COL1A  | 13 |
| MF | GO:0005518 | collagen bindi  | 15/175  | 69/18368  | 9.55E-17 | 7.09E-15 | 5.88E-15 | DCN/C  | 15 |
| MF | GO:0008201 | heparin bindi   | 20/175  | 166/18368 | 1.20E-16 | 7.12E-15 | 5.91E-15 | SOD3/I | 20 |
| MF | GO:1901681 | sulfur compo    | 21/175  | 265/18368 | 9.80E-14 | 4.85E-12 | 4.02E-12 | SOD3/I | 21 |
| MF | GO:0005178 | integrin bind   | 16/175  | 144/18368 | 5.51E-13 | 2.34E-11 | 1.94E-11 | COL3A  | 16 |
| MF | GO:0061134 | peptidase re    | 19/175  | 230/18368 | 7.49E-13 | 2.78E-11 | 2.31E-11 | TIMP1/ | 19 |
| MF | GO:0048407 | platelet-deriv  | 7/175   | 11/18368  | 2.02E-12 | 6.66E-11 | 5.53E-11 | COL1A  | 7  |
| MF | GO:0019838 | growth facto    | 15/175  | 141/18368 | 5.70E-12 | 1.69E-10 | 1.40E-10 | COL1A  | 15 |
| MF | GO:0050840 | extracellular   | 10/175  | 56/18368  | 1.16E-10 | 3.13E-09 | 2.60E-09 | BGN/D  | 10 |
| MF | GO:0061135 | endopeptida     | 15/175  | 194/18368 | 5.49E-10 | 1.36E-08 | 1.13E-08 | TIMP1/ | 15 |
| MF | GO:0004866 | endopeptida     | 14/175  | 180/18368 | 1.95E-09 | 4.46E-08 | 3.70E-08 | TIMP1/ | 14 |
| MF | GO:0030414 | peptidase inf   | 14/175  | 187/18368 | 3.21E-09 | 6.81E-08 | 5.65E-08 | TIMP1/ | 14 |
| MF | GO:0001968 | fibronectin b   | 7/175   | 28/18368  | 6.32E-09 | 1.19E-07 | 9.88E-08 | CTSK/S | 7  |
| MF | GO:0002020 | protease binc   | 12/175  | 135/18368 | 6.41E-09 | 1.19E-07 | 9.88E-08 | TIMP1/ | 12 |
| MF | GO:0008191 | metalloendo     | 5/175   | 16/18368  | 2.97E-07 | 5.20E-06 | 4.31E-06 | TIMP1/ | 5  |
| MF | GO:0043394 | proteoglycan    | 6/175   | 36/18368  | 1.05E-06 | 1.74E-05 | 1.44E-05 | FN1/C  | 6  |
| MF | GO:0008009 | chemokine a     | 6/175   | 49/18368  | 6.83E-06 | 0.000107 | 8.86E-05 | CXCL9/ | 6  |
| MF | GO:0005520 | insulin-like g  | 5/175   | 29/18368  | 7.31E-06 | 0.000109 | 9.01E-05 | IGFBP7 | 5  |
| MF | GO:0003779 | actin binding   | 15/175  | 441/18368 | 2.20E-05 | 0.000311 | 0.000258 | CALD1  | 15 |
| MF | GO:0030021 | extracellular   | 14/175  | 22/18368  | 5.09E-05 | 0.000687 | 0.00057  | BGN/D  | 4  |
| MF | GO:0016504 | peptidase act   | 5/175   | 43/18368  | 5.32E-05 | 0.000687 | 0.00057  | FN1/SF | 5  |
| MF | GO:0042379 | chemokine re    | 6/175   | 72/18368  | 6.37E-05 | 0.000789 | 0.000654 | CXCL9/ | 6  |
| MF | GO:0048018 | receptor ligand | 15/175  | 487/18368 | 6.82E-05 | 0.00081  | 0.000671 | TIMP1/ | 15 |
| MF | GO:0030546 | signaling rec   | 15/175  | 495/18368 | 8.18E-05 | 0.000934 | 0.000775 | TIMP1/ | 15 |
| MF | GO:0097493 | structural mc   | 3/175   | 11/18368  | 0.000133 | 0.001459 | 0.00121  | FBN1/E | 3  |
| MF | GO:0008083 | growth facto    | 8/175   | 162/18368 | 0.000164 | 0.001744 | 0.001446 | TIMP1/ | 8  |
| MF | GO:0031994 | insulin-like g  | 3/175   | 13/18368  | 0.000227 | 0.002321 | 0.001925 | IGFBP4 | 3  |
| MF | GO:0004252 | serine-type e   | 8/175   | 174/18368 | 0.000268 | 0.00265  | 0.002198 | C1S/CT | 8  |
| MF | GO:0004867 | serine-type e   | 6/175   | 98/18368  | 0.00035  | 0.003355 | 0.002782 | SERPIN | 6  |
| MF | GO:0008236 | serine-type r   | 8/175   | 191/18368 | 0.0005   | 0.004638 | 0.003846 | C1S/CT | 8  |
| MF | GO:0017171 | serine hydrol   | 8/175   | 195/18368 | 0.000573 | 0.005157 | 0.004277 | C1S/CT | 8  |
| MF | GO:0045236 | CXCR chemo      | 3/175   | 18/18368  | 0.000624 | 0.005454 | 0.004523 | CXCL9/ | 3  |
| MF | GO:0008307 | structural cor  | 4/175   | 42/18368  | 0.000672 | 0.005701 | 0.004728 | MYL9/  | 4  |
| MF | GO:0046332 | SMAD bindin     | 5/175   | 79/18368  | 0.000946 | 0.007803 | 0.006471 | COL1A  | 5  |
| MF | GO:0043236 | laminin bindi   | 3/175   | 28/18368  | 0.002337 | 0.018762 | 0.01556  | LGALS1 | 3  |
| MF | GO:0098631 | cell adhesion   | 4/175   | 59/18368  | 0.00241  | 0.018832 | 0.015618 | PALLD/ | 4  |
| MF | GO:0017147 | Wnt-protein     | 3/175   | 30/18368  | 0.002857 | 0.021755 | 0.018042 | SFRP2/ | 3  |
| MF | GO:0005516 | calmodulin b    | 7/175   | 201/18368 | 0.003188 | 0.023672 | 0.019633 | CALD1  | 7  |
| MF | GO:0005126 | cytokine rece   | 8/175   | 271/18368 | 0.004529 | 0.032804 | 0.027206 | CXCL9/ | 8  |
| MF | GO:0042805 | actinin bindir  | 3/175   | 36/18368  | 0.004818 | 0.03345  | 0.027742 | PALLD/ | 3  |
| MF | GO:0051015 | actin filamen   | 7/175   | 217/18368 | 0.004843 | 0.03345  | 0.027742 | TAGLN  | 7  |
| MF | GO:0005125 | cytokine activ  | 7/175   | 235/18368 | 0.007401 | 0.049117 | 0.040735 | TIMP1/ | 7  |
| MF | GO:0001664 | G protein-co    | 8/175   | 295/18368 | 0.007442 | 0.049117 | 0.040735 | CXCL9/ | 8  |
| MF | GO:0071837 | HMG box do      | 2/175   | 14/18368  | 0.007618 | 0.049185 | 0.040791 | PRRX1/ | 2  |
| MF | GO:0004175 | endopeptida     | 10/175  | 430/18368 | 0.008326 | 0.052614 | 0.043635 | C1S/CT | 10 |
| MF | GO:0051371 | muscle alpha    | 2/175   | 15/18368  | 0.008735 | 0.054049 | 0.044825 | PALLD/ | 2  |
| MF | GO:0016641 | oxidoreducta    | 2/175   | 16/18368  | 0.009921 | 0.060133 | 0.049871 | VCAM1  | 2  |
