# Supplementary material for: Development of a Cancer‐Associated Fibroblast‐Related Prognostic Model in Breast Cancer via Bulk and Single‐Cell RNA Sequencing
Source: Hindawi journal article supplement (doi:10.1155/2022/2955359), 2022-01-01
Supplement: f3 [file 2955359.f3.pdf]

| ID       | Description      | GeneRat | BgRatio  | pvalue   | p.adjust   | qvalue     | geneID     | Count |
|----------|------------------|---------|----------|----------|------------|------------|------------|-------|
| hsa04510 | Focal adhesio    | 20/91   | 201/8112 | 4.14E-14 | 7.075E-12  | 5.9231E-12 | COL1A1/CC  | 20    |
| hsa04974 | Protein digest   | 13/91   | 103/8112 | 8.71E-11 | 7.4442E-09 | 6.2321E-09 | COL1A1/CC  | 13    |
| hsa04512 | ECM-receptor     | 12/91   | 88/8112  | 1.94E-10 | 1.1031E-08 | 9.2346E-09 | COL1A1/CC  | 12    |
| hsa04933 | AGE-RAGE sig     | 11/91   | 100/8112 | 1.2E-08  | 5.1128E-07 | 4.2803E-07 | COL1A1/CC  | 11    |
| hsa04151 | PI3K-Akt signa   | 17/91   | 354/8112 | 3.08E-07 | 1.0523E-05 | 8.8094E-06 | COL1A1/CC  | 17    |
| hsa04610 | Complement       | 9/91    | 85/8112  | 3.86E-07 | 1.0991E-05 | 9.2012E-06 | C1S/SERPIN | 9     |
| hsa04926 | Relaxin signali  | 9/91    | 129/8112 | 1.28E-05 | 0.00031335 | 0.00026233 | COL1A1/CC  | 9     |
| hsa05165 | Human papillc    | 14/91   | 331/8112 | 1.66E-05 | 0.00032357 | 0.00027088 | COL1A1/CC  | 14    |
| hsa05146 | Amoebiasis       | 8/91    | 102/8112 | 1.7E-05  | 0.00032357 | 0.00027088 | COL1A1/CC  | 8     |
| hsa05205 | Proteoglycans    | 10/91   | 205/8112 | 9.22E-05 | 0.00157581 | 0.00131923 | COL1A1/DC  | 10    |
| hsa04810 | Regulation of    | 10/91   | 218/8112 | 0.000153 | 0.0023835  | 0.00199542 | MYL9/FN1/  | 10    |
| hsa05133 | Pertussis        | 6/91    | 76/8112  | 0.000196 | 0.00279961 | 0.00234378 | C1S/SERPIN | 6     |
| hsa05144 | Malaria          | 5/91    | 50/8112  | 0.000226 | 0.002977   | 0.00249228 | CCL2/THBS  | 5     |
| hsa04061 | Viral protein ii | 6/91    | 100/8112 | 0.000864 | 0.01055382 | 0.00883546 | CXCL9/CXC  | 6     |
| hsa04670 | Leukocyte trai   | 6/91    | 114/8112 | 0.001706 | 0.01944625 | 0.01628003 | MYL9/THY1  | 6     |
| hsa05410 | Hypertrophic     | 5/91    | 90/8112  | 0.003304 | 0.03531089 | 0.02956159 | TPM2/TPM   | 5     |
| hsa05323 | Rheumatoid a     | 5/91    | 93/8112  | 0.003806 | 0.0364932  | 0.0305514  | CTSK/CCL2, | 5     |
| hsa04270 | Vascular smoc    | 6/91    | 134/8112 | 0.003841 | 0.0364932  | 0.0305514  | MYL9/CALC  | 6     |
| hsa05150 | Staphylococcc    | 5/91    | 96/8112  | 0.00436  | 0.03700203 | 0.03097739 | C1S/C1R/C: | 5     |
| hsa05414 | Dilated cardio   | 5/91    | 96/8112  | 0.00436  | 0.03700203 | 0.03097739 | TPM2/TPM   | 5     |
| hsa05418 | Fluid shear str  | 6/91    | 139/8112 | 0.004596 | 0.03700203 | 0.03097739 | MMP2/CCL   | 6     |
| hsa01522 | Endocrine resi   | 5/91    | 98/8112  | 0.00476  | 0.03700203 | 0.03097739 | MMP2/FOC   | 5     |
| hsa04620 | Toll-like recep  | 5/91    | 104/8112 | 0.006118 | 0.04548306 | 0.03807754 | CTSK/CXCL! | 5     |
