# Supplementary material for: Development of a Cancer‐Associated Fibroblast‐Related Prognostic Model in Breast Cancer via Bulk and Single‐Cell RNA Sequencing
Source: Hindawi journal article supplement (doi:10.1155/2022/2955359), 2022-01-01
Supplement: f4 [file 2955359.f4.pdf]

fibroblasts.markergenes

TIMP1

COL1A1

BGN

DCN

COL1A2

MYL9

COL3A1

CALD1

C1S

COL6A2

TAGLN

SOD3

LUM

APOD

IGFBP7

IGFBP4

SPARC

RGS5

ACTA2

SERPINF1

SERPING1

COL6A1

FN1

CTSK

SFRP2

THY1

CCDC80

POSTN

CXCL9

NDUFA4L2

MFGE8

COL6A3

IFITM3

ISLR

PRSS23

CXCL14

PCOLCE

RGS16

LGALS3BP

CCL19

RARRES2

FRZB

CTGF

AEBP1

CD248

SPARCL1

NNMT

IGFBP5

TIMP3

GEM  
PDGFRB  
GSN  
C1R  
EGR1  
CTHRC1  
SELM  
CPE  
CYR61  
TPM2  
VCAN  
LHFP  
PTGDS  
C3  
MMP11  
TPM1  
COL5A2  
PALLD  
LGALS1  
MMP2  
CST3  
FILIP1L  
CCL2  
COL18A1  
CRISPLD2  
CYP1B1  
CXCL12  
PRRX1  
GGT5  
MXRA8  
FBLN1  
CFD  
COL4A2  
PTRF  
PLPP3  
PRKCDBP  
C11orf96  
OLFML3  
FSTL1  
SPON2  
SERPINH1  
CNN3  
MFAP4  
MYLK  
FOS  
EFEMP2  
NOTCH3  
MXRA5  
TGFB111  
SULF1

IGFBP6  
VIM  
PMP22  
PLAC9  
RASD1  
IFI27  
RARRES1  
SMOC2  
TFPI  
ADAMTS4  
MAP1B  
FBN1  
IFIT3  
MDK  
COL4A1  
DKK3  
C10orf10  
TMEM176B  
ADIRF  
DPT  
PLXDC1  
TMEM176A  
C1QTNF1  
GBP1  
PPIC  
THBS2  
HTRA3  
NR2F2  
SLIT3  
CDH11  
SEPT4  
UACA  
EDNRA  
JUN  
COX4I2  
ACTN1  
SEPP1  
LMNA  
TIMP2  
EFEMP1  
CAV1  
LRP1  
IFI6  
EMILIN1  
CLEC11A  
PGF  
CFH  
MFAP2  
COL12A1  
NUPR1

TCF4  
CSRP1  
THBS1  
EPS8  
CEBPD  
CERCAM  
DSTN  
COL14A1  
SYNPO2  
ATF3  
BST2  
MIR4435-2HG  
COL5A1  
F2R  
SEPT11  
FBLN2  
ID3  
SSPN  
FGF7  
GJA4  
ADAMTS1  
EHD2  
A2M  
S100A13  
VCAM1  
CILP  
MCAM  
CRYAB  
GUCY1A3  
LAMA4  
CST1  
MT2A  
LOXL1  
KCNJ8  
MYO1B  
MGP  
ITGA1  
PPP1R14A  
EPAS1  
ECM1  
CXCL11  
TSC22D1  
IGF1  
RAB13
